# Supplementary material for: Illumina-based Analysis of Endophytic Bacterial Diversity of four Allium species
Source: PubMed Central journal article supplement (PMC6813343; doi:10.1038/s41598-019-51707-7), 2019-10-24
Supplement: 41598_2019_51707_MOESM1_ESM.pdf [file 41598_2019_51707_MOESM1_ESM.pdf]

**Illumina-based Analysis of Endophytic Bacterial Diversity of four *Allium* species**

**Yonghong Huang**

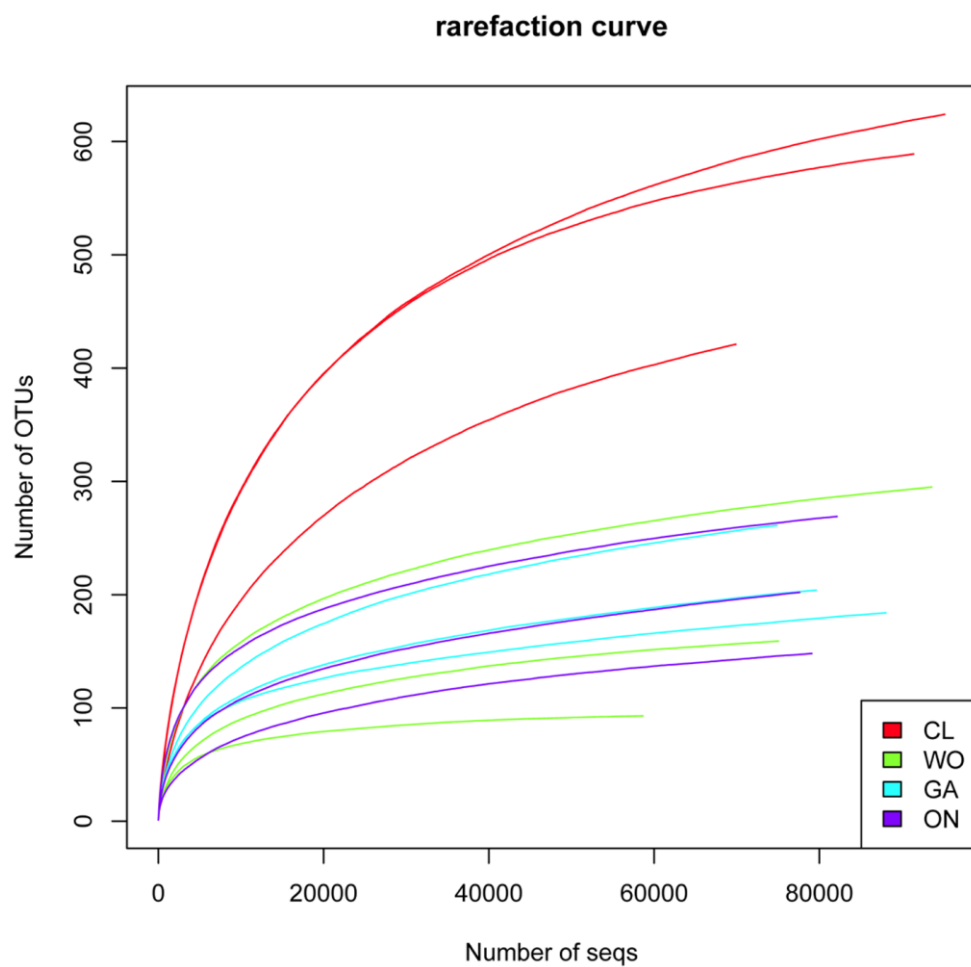

**Supplementary Figure S1.** Rarefaction curves based on the sequences of the V4–V5 region of the 16S rRNA gene from four *Allium* species CL: Chinese leek; WO: Welsh onion; GA: Garlic; ON: Onion.





|   |           |                                  |   |       |        |        |       |       |       |       |       |       |       |        |       |
|---|-----------|----------------------------------|---|-------|--------|--------|-------|-------|-------|-------|-------|-------|-------|--------|-------|
| 5 | 0.2.2.2.  | <i>Dermabacteraceae</i>          | 1 | 0.02% | 0.06%  | 0%     | 0%    | 0%    | 0%    | 0.09% | 0%    | 0%    | 0%    | 0.06%  | 0%    |
| 5 | 0.2.2.2.  | <i>Intrasporangiaceae</i>        | 1 | 0.05% | 0.03%  | 0.10%  | 0.05% | 0%    | 0%    | 0%    | 0%    | 0.08% | 0%    | 0%     | 0.30% |
| 5 | 0.2.2.2.  | <i>Microbacteriaceae</i>         | 3 | 0.59% | 1.01%  | 1.89%  | 1.01% | 1.20% | 0%    | 0.05% | 0%    | 0.17% | 0.53% | 0.05%  | 1.04% |
| 5 | 0.2.2.2.  | <i>Micrococcaceae</i>            | 2 | 0.91% | 0.87%  | 1.04%  | 3.16% | 0.30% | 0%    | 0.50% | 0.44% | 0.58% | 0.53% | 0.55%  | 2.68% |
| 5 | 0.2.2.2.  | <i>Promicromonosporaceae</i>     | 1 | 0.09% | 0.31%  | 0.17%  | 0.46% | 0%    | 0%    | 0%    | 0%    | 0%    | 0%    | 0%     | 0.15% |
| 5 | 0.2.2.2.  | <i>unclassified</i>              | 1 | 0.01% | 0.03%  | 0.12%  | 0%    | 0%    | 0%    | 0%    | 0%    | 0%    | 0%    | 0%     | 0%    |
| 5 | 0.2.2.2.  | <i>Micromonosporaceae</i>        | 4 | 0.42% | 0.74%  | 1.32%  | 2.20% | 0%    | 0%    | 0%    | 0%    | 0%    | 0.13% | 0.02%  | 0.60% |
| 5 | 0.2.2.2.  | <i>Nocardioideae</i>             | 3 | 0.23% | 0.43%  | 0.84%  | 0.60% | 0%    | 0%    | 0.05% | 0.06% | 0.08% | 0.13% | 0.07%  | 0.45% |
| 5 | 0.2.2.2.  | <i>Pseudonocardiaeae</i>         | 2 | 0.14% | 1.40%  | 0.26%  | 0.05% | 0%    | 0%    | 0%    | 0%    | 0%    | 0%    | 0%     | 0%    |
| 5 | 0.2.2.2.  | <i>Streptomycetaceae</i>         | 1 | 0.18% | 0.59%  | 0.41%  | 0.50% | 0%    | 0%    | 0.14% | 0.13% | 0.08% | 0%    | 0.25%  | 0%    |
| 5 | 0.2.2.2.  | <i>Streptosporangiaceae</i>      | 1 | 0.01% | 0%     | 0.05%  | 0.09% | 0%    | 0%    | 0%    | 0%    | 0%    | 0%    | 0%     | 0%    |
| 5 | 0.2.2.2.  | <i>Thermomonosporaceae</i>       | 1 | 0.04% | 0.04%  | 0.40%  | 0%    | 0%    | 0%    | 0%    | 0%    | 0%    | 0%    | 0%     | 0%    |
| 5 | 0.2.2.2.  | <i>unclassified</i>              | 1 | 0.03% | 0.08%  | 0.07%  | 0.05% | 0%    | 0%    | 0%    | 0%    | 0%    | 0%    | 0%     | 0.15% |
| 5 | 0.2.2.3.  | <i>Conexibacteraceae</i>         | 1 | 0.01% | 0.06%  | 0.07%  | 0.05% | 0%    | 0%    | 0%    | 0%    | 0%    | 0%    | 0%     | 0%    |
| 5 | 0.2.2.3.  | <i>unclassified</i>              | 1 | 0.09% | 0.29%  | 0.35%  | 0.41% | 0%    | 0%    | 0%    | 0%    | 0%    | 0%    | 0%     | 0%    |
| 5 | 0.2.2.4.  | <i>unclassified</i>              | 1 | 0.02% | 0.07%  | 0.08%  | 0.05% | 0%    | 0%    | 0%    | 0%    | 0%    | 0%    | 0%     | 0%    |
| 5 | 0.2.3.1.  | <i>Armatimonadaceae</i>          | 1 | 0.01% | 0%     | 0.03%  | 0.09% | 0%    | 0%    | 0%    | 0%    | 0%    | 0%    | 0%     | 0%    |
| 5 | 0.2.3.2.  | <i>unclassified</i>              | 1 | 0.08% | 0.18%  | 0.43%  | 0.14% | 0%    | 0%    | 0%    | 0%    | 0.07% | 0.05% | 0.06%  | 0%    |
| 5 | 0.2.4.1.  | <i>Bacteroidaceae</i>            | 1 | 0.05% | 0.04%  | 0%     | 0%    | 0.15% | 0%    | 0%    | 0%    | 0.17% | 0%    | 0%     | 0%    |
| 5 | 0.2.4.1.  | <i>Prevotellaceae</i>            | 1 | 0.01% | 0%     | 0%     | 0.09% | 0%    | 0%    | 0%    | 0%    | 0%    | 0%    | 0%     | 0%    |
| 5 | 0.2.4.2.  | <i>Cytophagaceae</i>             | 7 | 0.49% | 1.63%  | 1.84%  | 1.51% | 0.30% | 0%    | 0.23% | 0%    | 0%    | 0.20% | 0.17%  | 0%    |
| 5 | 0.2.4.2.  | <i>unclassified</i>              | 1 | 0.02% | 0.06%  | 0.15%  | 0.05% | 0%    | 0%    | 0%    | 0%    | 0%    | 0%    | 0%     | 0%    |
| 5 | 0.2.4.3.  | <i>Cryomorphaceae</i>            | 1 | 0.03% | 0.15%  | 0.15%  | 0.05% | 0%    | 0%    | 0%    | 0%    | 0%    | 0%    | 0%     | 0%    |
| 5 | 0.2.4.3.  | <i>Flavobacteriaceae</i>         | 4 | 3.34% | 13.13% | 10.19% | 9.35% | 4.67% | 0%    | 0.27% | 0.25% | 0.08% | 0.86% | 0.62%  | 0.38% |
| 5 | 0.2.4.4.  | <i>Chitinophagaceae</i>          | 6 | 0.74% | 3.36%  | 2.55%  | 2.25% | 0%    | 0%    | 0.14% | 0.06% | 0%    | 0.07% | 0.07%  | 0.38% |
| 5 | 0.2.4.4.  | <i>KD3-93</i>                    | 1 | 0.01% | 0.03%  | 0%     | 0.14% | 0%    | 0%    | 0%    | 0%    | 0%    | 0%    | 0%     | 0%    |
| 5 | 0.2.4.4.  | <i>NS11-12 marine group</i>      | 1 | 0.02% | 0.04%  | 0%     | 0.18% | 0%    | 0%    | 0%    | 0%    | 0%    | 0%    | 0%     | 0%    |
| 5 | 0.2.4.4.  | <i>Sphingobacteriaceae</i>       | 5 | 1.31% | 3.43%  | 5.74%  | 3.58% | 1.05% | 0%    | 0.05% | 0%    | 0.17% | 0.47% | 0.35%  | 0.60% |
| 5 | 0.2.4.4.  | <i>env. OPS 17</i>               | 1 | 0.02% | 0.10%  | 0.07%  | 0.05% | 0%    | 0%    | 0%    | 0%    | 0%    | 0%    | 0%     | 0%    |
| 5 | 0.2.4.4.  | <i>unclassified</i>              | 1 | 0.01% | 0.08%  | 0.05%  | 0.05% | 0%    | 0%    | 0%    | 0%    | 0%    | 0%    | 0%     | 0%    |
| 5 | 0.2.4.5.  | <i>unclassified</i>              | 1 | 0.04% | 0.25%  | 0.18%  | 0.05% | 0%    | 0%    | 0%    | 0%    | 0%    | 0%    | 0%     | 0%    |
| 5 | 0.2.5.1.  | <i>unclassified</i>              | 1 | 0.01% | 0%     | 0.05%  | 0.05% | 0%    | 0%    | 0%    | 0%    | 0%    | 0%    | 0%     | 0%    |
| 5 | 0.2.6.1.  | <i>unclassified</i>              | 1 | 0.03% | 0.22%  | 0.12%  | 0%    | 0%    | 0%    | 0%    | 0%    | 0%    | 0%    | 0.07%  | 0%    |
| 5 | 0.2.7.1.  | <i>Unknown Family</i>            | 1 | 0.02% | 0.01%  | 0%     | 0%    | 0%    | 0%    | 0%    | 0.06% | 0.08% | 0.07% | 0.02%  | 0%    |
| 5 | 0.2.7.2.  | <i>unclassified</i>              | 1 | 0.10% | 0.29%  | 0.18%  | 0.41% | 0%    | 0%    | 0.13% | 0.08% | 0%    | 0.07% | 0%     | 0%    |
| 5 | 0.2.8.1.  | <i>Parachlamydiaceae</i>         | 2 | 0.02% | 0.14%  | 0.08%  | 0.05% | 0%    | 0%    | 0%    | 0%    | 0%    | 0%    | 0%     | 0%    |
| 5 | 0.2.9.1.  | <i>SJA-28</i>                    | 1 | 0%    | 0.04%  | 0.02%  | 0%    | 0%    | 0%    | 0%    | 0%    | 0%    | 0%    | 0%     | 0%    |
| 5 | 0.2.9.2.  | <i>unclassified</i>              | 1 | 0.03% | 0.01%  | 0.03%  | 0.28% | 0%    | 0%    | 0%    | 0%    | 0%    | 0%    | 0%     | 0%    |
| 5 | 0.2.10.1. | <i>Anaerolineaceae</i>           | 1 | 0.01% | 0%     | 0.02%  | 0.05% | 0%    | 0%    | 0%    | 0%    | 0%    | 0.02% | 0%     | 0%    |
| 5 | 0.2.10.2. | <i>Caldilineaceae</i>            | 2 | 0.01% | 0.06%  | 0.05%  | 0.05% | 0%    | 0%    | 0%    | 0%    | 0%    | 0%    | 0%     | 0%    |
| 5 | 0.2.10.3. | <i>Chloroflexales Incertae</i>   | 1 | 0.02% | 0.11%  | 0.05%  | 0.09% | 0%    | 0%    | 0%    | 0%    | 0%    | 0%    | 0%     | 0%    |
| 5 | 0.2.10.3. | <i>Roseiflexaceae</i>            | 1 | 0.05% | 0.10%  | 0.10%  | 0.14% | 0%    | 0%    | 0%    | 0.08% | 0%    | 0%    | 0%     | 0.15% |
| 5 | 0.2.10.4. | <i>unclassified</i>              | 1 | 0.01% | 0.03%  | 0.03%  | 0%    | 0%    | 0%    | 0%    | 0%    | 0%    | 0%    | 0%     | 0%    |
| 5 | 0.2.10.5. | <i>Thermosporotrichaceae</i>     | 1 | 0.01% | 0%     | 0%     | 0%    | 0%    | 0%    | 0%    | 0%    | 0%    | 0.12% | 0%     | 0%    |
| 5 | 0.2.10.6. | <i>unclassified</i>              | 1 | 0.03% | 0.06%  | 0.15%  | 0.09% | 0%    | 0%    | 0%    | 0%    | 0.07% | 0%    | 0%     | 0%    |
| 5 | 0.2.10.7. | <i>unclassified</i>              | 1 | 0.02% | 0.11%  | 0.10%  | 0%    | 0%    | 0%    | 0%    | 0%    | 0%    | 0%    | 0%     | 0%    |
| 5 | 0.2.10.7. | <i>unclassified</i>              | 1 | 0.36% | 0.63%  | 1.27%  | 1.51% | 0%    | 0%    | 0%    | 0%    | 0.07% | 0.07% | 0%     | 0.74% |
| 5 | 0.2.10.8. | <i>unclassified</i>              | 1 | 0.03% | 0.15%  | 0.20%  | 0.05% | 0%    | 0%    | 0%    | 0%    | 0%    | 0%    | 0%     | 0%    |
| 5 | 0.2.11.1. | <i>Bacillaceae</i>               | 1 | 1.34% | 0.13%  | 0%     | 0%    | 0.15% | 0%    | 4.30% | 0.06% | 0.08% | 0.27% | 10.82% | 0.25% |
| 5 | 0.2.11.1. | <i>Paenibacillaceae</i>          | 2 | 0.26% | 1.40%  | 0.66%  | 1.01% | 0%    | 0%    | 0%    | 0%    | 0.07% | 0%    | 0%     | 0%    |
| 5 | 0.2.11.1. | <i>Planococcaceae</i>            | 1 | 0.08% | 0.06%  | 0.02%  | 0%    | 0%    | 0%    | 0.09% | 0%    | 0%    | 0.07% | 0.35%  | 0.19% |
| 5 | 0.2.11.1. | <i>Staphylococcaceae</i>         | 1 | 0.05% | 0.06%  | 0.02%  | 0%    | 0%    | 0%    | 0.14% | 0%    | 0.17% | 0.07% | 0.07%  | 0.06% |
| 5 | 0.2.11.1. | <i>Carnobacteriaceae</i>         | 1 | 0.06% | 0%     | 0.02%  | 0%    | 0%    | 0%    | 0.05% | 0%    | 0%    | 0.07% | 0.17%  | 0.06% |
| 5 | 0.2.11.1. | <i>Enterococcaceae</i>           | 1 | 0.39% | 0%     | 0%     | 0%    | 0%    | 0%    | 1.42% | 0%    | 0%    | 0%    | 3.32%  | 0%    |
| 5 | 0.2.11.1. | <i>Streptococcaceae</i>          | 1 | 0.02% | 0.01%  | 0%     | 0%    | 0%    | 0%    | 0%    | 0.06% | 0%    | 0.07% | 0%     | 0.06% |
| 5 | 0.2.11.2. | <i>Lachnospiraceae</i>           | 1 | 0.01% | 0.06%  | 0.05%  | 0.05% | 0%    | 0%    | 0%    | 0%    | 0%    | 0%    | 0%     | 0%    |
| 5 | 0.2.11.2. | <i>Ruminococcaceae</i>           | 2 | 0.01% | 0.03%  | 0%     | 0%    | 0%    | 0%    | 0.09% | 0%    | 0%    | 0%    | 0.05%  | 0%    |
| 5 | 0.2.11.3. | <i>unclassified</i>              | 1 | 0.02% | 0%     | 0%     | 0%    | 0%    | 0%    | 0.05% | 0.13% | 0%    | 0%    | 0.02%  | 0%    |
| 5 | 0.2.12.1. | <i>Fusobacteriaceae</i>          | 1 | 0.05% | 0.06%  | 0%     | 0%    | 0%    | 0%    | 0.09% | 0.13% | 0.17% | 0%    | 0%     | 0.15% |
| 5 | 0.2.13.1. | <i>Gemmatimonadaceae</i>         | 1 | 0%    | 0.01%  | 0.03%  | 0%    | 0%    | 0%    | 0%    | 0%    | 0%    | 0%    | 0%     | 0%    |
| 5 | 0.2.14.1. | <i>Nitrospiraceae</i>            | 1 | 0%    | 0%     | 0.05%  | 0%    | 0%    | 0%    | 0%    | 0%    | 0%    | 0%    | 0%     | 0%    |
| 5 | 0.2.15.1. | <i>unclassified</i>              | 1 | 0.05% | 0.03%  | 0.31%  | 0.23% | 0%    | 0%    | 0%    | 0%    | 0%    | 0%    | 0%     | 0%    |
| 5 | 0.2.15.2. | <i>Planctomycetaceae</i>         | 5 | 0.39% | 0.85%  | 1.85%  | 1.33% | 0%    | 0%    | 0.05% | 0.06% | 0.08% | 0.13% | 0.07%  | 0.30% |
| 5 | 0.2.15.3. | <i>unclassified</i>              | 1 | 0.01% | 0.11%  | 0.05%  | 0%    | 0%    | 0%    | 0%    | 0%    | 0%    | 0%    | 0%     | 0%    |
| 5 | 0.2.16.1. | <i>Caulobacteraceae</i>          | 4 | 0.19% | 0.67%  | 0.28%  | 0.83% | 0.30% | 0%    | 0.05% | 0.06% | 0.08% | 0%    | 0.05%  | 0%    |
| 5 | 0.2.16.1. | <i>Hyphomonadaceae</i>           | 1 | 0.06% | 0.10%  | 0.18%  | 0.46% | 0%    | 0%    | 0%    | 0%    | 0%    | 0%    | 0%     | 0%    |
| 5 | 0.2.16.1. | <i>unclassified</i>              | 1 | 0.03% | 0.03%  | 0.05%  | 0.23% | 0%    | 0%    | 0%    | 0%    | 0%    | 0%    | 0.05%  | 0%    |
| 5 | 0.2.16.1. | <i>Beijerinckiaceae</i>          | 1 | 0.02% | 0.03%  | 0.02%  | 0.18% | 0%    | 0%    | 0%    | 0%    | 0%    | 0%    | 0%     | 0%    |
| 5 | 0.2.16.1. | <i>Bradyrhizobiaceae</i>         | 4 | 0.27% | 0.71%  | 0.88%  | 1.24% | 0%    | 0%    | 0.09% | 0.06% | 0%    | 0.13% | 0.07%  | 0%    |
| 5 | 0.2.16.1. | <i>Brucecellaceae</i>            | 1 | 0.24% | 0.34%  | 0.61%  | 0.60% | 0.75% | 0%    | 0%    | 0.06% | 0.17% | 0.13% | 0.07%  | 0.15% |
| 5 | 0.2.16.1. | <i>Hyphomicrobiaceae</i>         | 5 | 1.51% | 2.10%  | 2.75%  | 2.52% | 3.31% | 0.55% | 1.05% | 0.38% | 1.66% | 1.06% | 0.62%  | 1.50% |
| 5 | 0.2.16.1. | <i>Methylobacteriaceae</i>       | 2 | 0.07% | 0.11%  | 0.07%  | 0.32% | 0%    | 0%    | 0%    | 0%    | 0%    | 0.13% | 0.05%  | 0.15% |
| 5 | 0.2.16.1. | <i>Phyllobacteriaceae</i>        | 2 | 0.89% | 0.46%  | 0.98%  | 1.10% | 1.66% | 0.55% | 0.91% | 0.63% | 1.08% | 0.86% | 0.65%  | 1.19% |
| 5 | 0.2.16.1. | <i>Rhizobiaceae</i>              | 3 | 1.33% | 3.18%  | 3.21%  | 3.44% | 3.31% | 0%    | 0.05% | 0.13% | 0.17% | 0.27% | 0.37%  | 1.64% |
| 5 | 0.2.16.1. | <i>Rhizobiales Incertae Se</i>   | 3 | 0.08% | 0.20%  | 0.45%  | 0.14% | 0%    | 0%    | 0%    | 0.06% | 0%    | 0%    | 0.06%  | 0%    |
| 5 | 0.2.16.1. | <i>Xanthobacteraceae</i>         | 2 | 0.04% | 0.21%  | 0.05%  | 0.05% | 0%    | 0%    | 0%    | 0%    | 0%    | 0%    | 0%     | 0.15% |
| 5 | 0.2.16.1. | <i>unclassified</i>              | 1 | 0.46% | 1.50%  | 2.05%  | 1.24% | 0%    | 0%    | 0%    | 0.06% | 0.17% | 0%    | 0.12%  | 0.30% |
| 5 | 0.2.16.1. | <i>Rhodobacteraceae</i>          | 2 | 0.09% | 0.01%  | 0.05%  | 0.87% | 0%    | 0%    | 0.05% | 0%    | 0%    | 0.07% | 0%     | 0%    |
| 5 | 0.2.16.1. | <i>AKVH478</i>                   | 1 | 0.03% | 0.06%  | 0.25%  | 0.05% | 0%    | 0%    | 0.05% | 0%    | 0%    | 0%    | 0%     | 0%    |
| 5 | 0.2.16.1. | <i>Acetobacteraceae</i>          | 1 | 0.01% | 0.03%  | 0.10%  | 0.05% | 0%    | 0%    | 0%    | 0%    | 0%    | 0%    | 0%     | 0%    |
| 5 | 0.2.16.1. | <i>MNC12</i>                     | 1 | 0%    | 0.01%  | 0.02%  | 0%    | 0%    | 0%    | 0%    | 0%    | 0%    | 0%    | 0%     | 0%    |
| 5 | 0.2.16.1. | <i>Rhodospirillaceae</i>         | 3 | 0.08% | 0.31%  | 0.38%  | 0.23% | 0%    | 0%    | 0%    | 0%    | 0%    | 0%    | 0%     | 0%    |
| 5 | 0.2.16.1. | <i>Rhodospirillales Incertae</i> | 2 | 0.05% | 0.14%  | 0.23%  | 0.28% | 0%    | 0%    | 0%    | 0%    | 0%    | 0%    | 0%     | 0%    |
| 5 | 0.2.16.1. | <i>unclassified</i>              | 1 | 0.04% | 0.11%  | 0.26%  | 0.09% | 0%    | 0%    | 0%    | 0%    | 0.07% | 0%    | 0%     | 0%    |
| 5 | 0.2.16.1. | <i>Erythrobacteraceae</i>        | 1 | 0.04% | 0.08%  | 0.08%  | 0.28% | 0%    | 0%    | 0%    | 0%    | 0%    | 0%    | 0%     | 0%    |
| 5 | 0.2.16.1. | <i>Sphingomonadaceae</i>         | 4 | 0.50% | 0.92%  | 1.14%  | 1.88% | 0%    | 0%    | 0%    | 0.06% | 0.08% | 0.13% | 0.02%  | 1.49% |
| 5 | 0.2.16.1. | <i>unclassified</i>              | 1 | 0.06% | 0.20%  | 0.07%  | 0.23% | 0%    | 0%    | 0%    | 0.06% | 0%    | 0%    | 0.13%  | 0%    |
| 5 | 0.2.16.1. | <i>unclassified</i>              | 1 | 0.34% | 0.10%  | 0.31%  | 0.69% | 0%    | 0%    | 0%    | 0.19% | 0.50% | 2.33% | 0%     | 0%    |
| 5 | 0.2.16.2. | <i>Alcaligenaceae</i>            | 1 | 0.35% | 0.97%  | 1.44%  | 1.10% | 0.30% | 0%    | 0.05% | 0%    | 0.08% | 0.13% | 0.02%  | 0.06% |

|   |          |                                |    |        |        |        |        |        |        |        |        |        |        |        |        |        |
|---|----------|--------------------------------|----|--------|--------|--------|--------|--------|--------|--------|--------|--------|--------|--------|--------|--------|
| 5 | 0.2.16.2 | <i>Burkholderiaceae</i>        | 2  | 0.07%  | 0.03%  | 0.05%  | 0.09%  | 0%     | 0%     | 0.05%  | 0.06%  | 0%     | 0.47%  | 0.05%  | 0.06%  | 0%     |
| 5 | 0.2.16.2 | <i>Comamonadaceae</i>          | 10 | 1.14%  | 3.53%  | 4.37%  | 3.03%  | 1.05%  | 0%     | 0.14%  | 0.13%  | 0.25%  | 0.93%  | 0.10%  | 0.13%  | 0%     |
| 5 | 0.2.16.2 | <i>Oxalobacteraceae</i>        | 4  | 0.74%  | 1.12%  | 1.64%  | 1.60%  | 3.46%  | 0%     | 0%     | 0%     | 0.17%  | 0.60%  | 0.15%  | 0%     | 0.15%  |
| 5 | 0.2.16.2 | <i>Methylophilaceae</i>        | 4  | 0.49%  | 0.81%  | 0.63%  | 0.83%  | 3.16%  | 0%     | 0%     | 0.06%  | 0%     | 0.13%  | 0%     | 0.13%  | 0.15%  |
| 5 | 0.2.16.2 | <i>Nitrosomonadaceae</i>       | 1  | 0.02%  | 0.01%  | 0.08%  | 0.09%  | 0%     | 0%     | 0%     | 0%     | 0%     | 0%     | 0%     | 0%     | 0%     |
| 5 | 0.2.16.2 | <i>Rhodocyclaceae</i>          | 1  | 0.12%  | 0.45%  | 0.28%  | 0.32%  | 0.30%  | 0%     | 0%     | 0%     | 0%     | 0%     | 0%     | 0.06%  | 0%     |
| 5 | 0.2.16.2 | <i>unclassified</i>            | 1  | 0.02%  | 0.03%  | 0.12%  | 0%     | 0%     | 0%     | 0.05%  | 0%     | 0%     | 0%     | 0%     | 0%     | 0%     |
| 5 | 0.2.16.2 | <i>unclassified</i>            | 1  | 0.02%  | 0.10%  | 0.10%  | 0.05%  | 0%     | 0%     | 0%     | 0%     | 0%     | 0%     | 0%     | 0%     | 0%     |
| 5 | 0.2.16.3 | <i>Bdellovibrionaceae</i>      | 2  | 0.02%  | 0.10%  | 0.08%  | 0.05%  | 0%     | 0%     | 0%     | 0%     | 0%     | 0%     | 0.02%  | 0%     | 0%     |
| 5 | 0.2.16.3 | <i>Nannocystaceae</i>          | 1  | 0.04%  | 0.08%  | 0.30%  | 0.05%  | 0%     | 0%     | 0%     | 0%     | 0%     | 0%     | 0%     | 0%     | 0%     |
| 5 | 0.2.16.3 | <i>Polyangiaceae</i>           | 3  | 0.10%  | 0.38%  | 0.40%  | 0.37%  | 0%     | 0%     | 0%     | 0%     | 0%     | 0%     | 0%     | 0%     | 0%     |
| 5 | 0.2.16.3 | <i>unclassified</i>            | 1  | 0.12%  | 0.25%  | 0.68%  | 0.46%  | 0%     | 0%     | 0.05%  | 0%     | 0%     | 0%     | 0.05%  | 0%     | 0%     |
| 5 | 0.2.16.3 | <i>unclassified</i>            | 1  | 0.01%  | 0.04%  | 0.13%  | 0%     | 0%     | 0%     | 0%     | 0%     | 0%     | 0%     | 0%     | 0%     | 0%     |
| 5 | 0.2.16.4 | <i>Enterobacteriaceae</i>      | 5  | 2.38%  | 13.00% | 6.14%  | 3.58%  | 1.36%  | 0%     | 0.46%  | 0.13%  | 0.58%  | 1.13%  | 0.45%  | 0.25%  | 1.49%  |
| 5 | 0.2.16.4 | <i>unclassified</i>            | 1  | 0%     | 0%     | 0.03%  | 0%     | 0%     | 0%     | 0%     | 0%     | 0%     | 0%     | 0%     | 0%     | 0%     |
| 5 | 0.2.16.4 | <i>Halomonadaceae</i>          | 1  | 1.52%  | 0.76%  | 0.66%  | 0.09%  | 1.96%  | 1.10%  | 1.60%  | 1.19%  | 2.16%  | 3.73%  | 1.67%  | 2.01%  | 1.34%  |
| 5 | 0.2.16.4 | <i>Oceanospirillaceae</i>      | 1  | 0.01%  | 0.01%  | 0.08%  | 0%     | 0%     | 0%     | 0%     | 0%     | 0%     | 0%     | 0%     | 0%     | 0%     |
| 5 | 0.2.16.4 | <i>Moraxellaceae</i>           | 2  | 0.33%  | 0.32%  | 0.20%  | 0.05%  | 0%     | 0%     | 0.50%  | 0.31%  | 0.17%  | 0.07%  | 0.67%  | 0.38%  | 1.34%  |
| 5 | 0.2.16.4 | <i>Pseudomonadaceae</i>        | 3  | 2.74%  | 7.95%  | 5.39%  | 9.45%  | 1.36%  | 0%     | 0.55%  | 0.06%  | 0.58%  | 1.53%  | 1.00%  | 2.32%  | 2.68%  |
| 5 | 0.2.16.4 | <i>Xanthomonadaceae</i>        | 9  | 0.84%  | 1.99%  | 2.84%  | 3.48%  | 0.60%  | 0%     | 0.14%  | 0.06%  | 0.17%  | 0.53%  | 0.17%  | 0.13%  | 0%     |
| 5 | 0.2.16.4 | <i>Xanthomonadales Incerta</i> | 1  | 0.03%  | 0.27%  | 0.13%  | 0%     | 0%     | 0%     | 0%     | 0%     | 0%     | 0%     | 0%     | 0%     | 0%     |
| 5 | 0.2.16.4 | <i>unclassified</i>            | 1  | 0.15%  | 0.31%  | 0.71%  | 0.64%  | 0%     | 0%     | 0.05%  | 0%     | 0%     | 0.07%  | 0%     | 0%     | 0%     |
| 5 | 0.2.16.5 | <i>unclassified</i>            | 1  | 0.06%  | 0.11%  | 0.41%  | 0.18%  | 0%     | 0%     | 0%     | 0%     | 0%     | 0.07%  | 0%     | 0%     | 0%     |
| 5 | 0.2.17.1 | <i>unclassified</i>            | 1  | 0.01%  | 0%     | 0%     | 0%     | 0%     | 0%     | 0%     | 0%     | 0%     | 0.13%  | 0%     | 0%     | 0%     |
| 5 | 0.2.17.2 | <i>unclassified</i>            | 1  | 0.01%  | 0%     | 0.02%  | 0.05%  | 0%     | 0%     | 0%     | 0%     | 0%     | 0%     | 0%     | 0%     | 0%     |
| 5 | 0.2.17.3 | <i>DA101 soil group</i>        | 1  | 0.04%  | 0.17%  | 0.18%  | 0.14%  | 0%     | 0%     | 0%     | 0%     | 0%     | 0%     | 0%     | 0%     | 0%     |
| 5 | 0.2.17.3 | <i>Xiphinematobacteraceae</i>  | 1  | 0.02%  | 0.04%  | 0.17%  | 0%     | 0%     | 0%     | 0.05%  | 0%     | 0%     | 0%     | 0%     | 0%     | 0%     |
| 5 | 0.2.17.3 | <i>unclassified</i>            | 1  | 0.01%  | 0%     | 0.07%  | 0%     | 0%     | 0%     | 0%     | 0%     | 0%     | 0%     | 0%     | 0%     | 0%     |
| 5 | 0.2.17.4 | <i>Verrucomicrobiaceae</i>     | 5  | 0.26%  | 0.74%  | 1.60%  | 0.55%  | 0%     | 0%     | 0%     | 0%     | 0%     | 0%     | 0.12%  | 0%     | 0.15%  |
| 5 | 0.2.17.5 | <i>unclassified</i>            | 1  | 0.02%  | 0.07%  | 0.18%  | 0%     | 0%     | 0%     | 0%     | 0%     | 0%     | 0%     | 0%     | 0%     | 0%     |
| 5 | 0.2.18.1 | <i>unclassified</i>            | 1  | 61.77% | 17.18% | 14.39% | 20.77% | 68.83% | 97.25% | 80.29% | 91.33% | 64.98% | 55.36% | 69.14% | 86.40% | 75.30% |
| 6 | 0.1.1.1  | <i>unclassified</i>            | 1  | 6.16%  | 0.99%  | 4.12%  | 0.32%  | 0%     | 0.55%  | 5.67%  | 3.20%  | 24.56% | 25.02% | 6.53%  | 2.32%  | 0.60%  |
| 6 | 0.1.1.1  | <i>Halorubrum</i>              | 0  | 0.02%  | 0.03%  | 0%     | 0%     | 0%     | 0%     | 0%     | 0%     | 0%     | 0.07%  | 0%     | 0%     | 0.15%  |
| 6 | 0.2.1.1  | <i>Bryobacter</i>              | 0  | 0.05%  | 0.14%  | 0.17%  | 0.23%  | 0%     | 0%     | 0%     | 0%     | 0%     | 0.07%  | 0%     | 0%     | 0%     |
| 6 | 0.2.1.1  | <i>Blastocatella</i>           | 0  | 0.09%  | 0.20%  | 0.46%  | 0.28%  | 0%     | 0%     | 0.09%  | 0%     | 0%     | 0%     | 0%     | 0%     | 0%     |
| 6 | 0.2.1.1  | <i>unclassified</i>            | 0  | 0.03%  | 0.21%  | 0.07%  | 0.05%  | 0%     | 0%     | 0%     | 0%     | 0%     | 0%     | 0%     | 0%     | 0%     |
| 6 | 0.2.1.2  | <i>unclassified</i>            | 0  | 0.04%  | 0.10%  | 0.31%  | 0.09%  | 0%     | 0%     | 0%     | 0%     | 0%     | 0%     | 0%     | 0%     | 0%     |
| 6 | 0.2.2.1  | <i>Ilumatobacter</i>           | 0  | 0.07%  | 0.13%  | 0.30%  | 0.18%  | 0%     | 0%     | 0%     | 0%     | 0%     | 0%     | 0.05%  | 0%     | 0.15%  |
| 6 | 0.2.2.1  | <i>unclassified</i>            | 0  | 0.02%  | 0.08%  | 0.10%  | 0.05%  | 0%     | 0%     | 0%     | 0%     | 0%     | 0%     | 0%     | 0%     | 0%     |
| 6 | 0.2.2.1  | <i>unclassified</i>            | 0  | 0.04%  | 0.14%  | 0.20%  | 0.14%  | 0%     | 0%     | 0%     | 0%     | 0%     | 0%     | 0%     | 0%     | 0%     |
| 6 | 0.2.2.2  | <i>Corynebacterium</i>         | 0  | 0.08%  | 0.03%  | 0.02%  | 0.09%  | 0.15%  | 0%     | 0.14%  | 0.13%  | 0.08%  | 0.13%  | 0.10%  | 0.06%  | 0%     |
| 6 | 0.2.2.2  | <i>Mycobacterium</i>           | 0  | 0.45%  | 0.60%  | 1.07%  | 0.87%  | 0.15%  | 0%     | 0%     | 0%     | 0%     | 0.33%  | 0%     | 0.19%  | 2.23%  |
| 6 | 0.2.2.2  | <i>Gordonia</i>                | 0  | 0.05%  | 0.04%  | 0.02%  | 0.09%  | 0.15%  | 0%     | 0%     | 0%     | 0.17%  | 0%     | 0.02%  | 0%     | 0.15%  |
| 6 | 0.2.2.2  | <i>Nocardia</i>                | 0  | 0.01%  | 0.01%  | 0%     | 0.09%  | 0%     | 0%     | 0%     | 0%     | 0%     | 0%     | 0.02%  | 0%     | 0%     |
| 6 | 0.2.2.2  | <i>Rhodococcus</i>             | 0  | 0.41%  | 1.39%  | 1.07%  | 1.56%  | 0%     | 0%     | 0.14%  | 0%     | 0%     | 0.33%  | 0.05%  | 0.06%  | 0.30%  |
| 6 | 0.2.2.2  | <i>Nakamurella</i>             | 0  | 0.01%  | 0.01%  | 0.02%  | 0.09%  | 0%     | 0%     | 0%     | 0%     | 0%     | 0%     | 0%     | 0%     | 0%     |
| 6 | 0.2.2.2  | <i>Kineosporia</i>             | 0  | 0.04%  | 0.07%  | 0.10%  | 0.32%  | 0%     | 0%     | 0%     | 0%     | 0%     | 0%     | 0%     | 0%     | 0%     |
| 6 | 0.2.2.2  | <i>Cellulomonas</i>            | 0  | 0.03%  | 0.10%  | 0%     | 0%     | 0%     | 0%     | 0%     | 0%     | 0%     | 0.07%  | 0%     | 0%     | 0.15%  |
| 6 | 0.2.2.2  | <i>Brachybacterium</i>         | 0  | 0.02%  | 0.06%  | 0%     | 0%     | 0%     | 0%     | 0.09%  | 0%     | 0%     | 0%     | 0%     | 0.06%  | 0%     |
| 6 | 0.2.2.2  | <i>unclassified</i>            | 0  | 0.05%  | 0.03%  | 0.10%  | 0.05%  | 0%     | 0%     | 0%     | 0%     | 0.08%  | 0%     | 0%     | 0.06%  | 0.30%  |
| 6 | 0.2.2.2  | <i>Agromyces</i>               | 0  | 0.04%  | 0.04%  | 0.13%  | 0.14%  | 0%     | 0%     | 0%     | 0%     | 0%     | 0.07%  | 0%     | 0.06%  | 0%     |
| 6 | 0.2.2.2  | <i>Microbacterium</i>          | 0  | 0.16%  | 0.38%  | 0.76%  | 0.23%  | 0.15%  | 0%     | 0%     | 0%     | 0%     | 0.20%  | 0.02%  | 0%     | 0.15%  |
| 6 | 0.2.2.2  | <i>unclassified</i>            | 0  | 0.40%  | 0.59%  | 0.99%  | 0.64%  | 1.05%  | 0%     | 0.05%  | 0%     | 0.17%  | 0.27%  | 0.02%  | 0.13%  | 0.89%  |
| 6 | 0.2.2.2  | <i>Arthrobacter</i>            | 0  | 0.73%  | 0.84%  | 0.91%  | 3.16%  | 0.30%  | 0%     | 0.18%  | 0.06%  | 0.17%  | 0.27%  | 0.42%  | 0.06%  | 2.38%  |
| 6 | 0.2.2.2  | <i>Nesterenkonia</i>           | 0  | 0.18%  | 0.03%  | 0.13%  | 0%     | 0%     | 0%     | 0.32%  | 0.38%  | 0.41%  | 0.27%  | 0.12%  | 0.19%  | 0.30%  |
| 6 | 0.2.2.2  | <i>Cellulosimicrobium</i>      | 0  | 0.09%  | 0.31%  | 0.17%  | 0.46%  | 0%     | 0%     | 0%     | 0%     | 0%     | 0%     | 0%     | 0.15%  | 0%     |
| 6 | 0.2.2.2  | <i>unclassified</i>            | 0  | 0.01%  | 0.03%  | 0.12%  | 0%     | 0%     | 0%     | 0%     | 0%     | 0%     | 0%     | 0%     | 0%     | 0%     |
| 6 | 0.2.2.2  | <i>Actinoplanes</i>            | 0  | 0.04%  | 0%     | 0.03%  | 0.23%  | 0%     | 0%     | 0%     | 0%     | 0%     | 0%     | 0%     | 0.06%  | 0.15%  |
| 6 | 0.2.2.2  | <i>Dactylosporangium</i>       | 0  | 0.05%  | 0.03%  | 0.10%  | 0.37%  | 0%     | 0%     | 0%     | 0%     | 0%     | 0.07%  | 0%     | 0%     | 0%     |
| 6 | 0.2.2.2  | <i>Virgisporangium</i>         | 0  | 0.04%  | 0.11%  | 0.12%  | 0.09%  | 0%     | 0%     | 0%     | 0%     | 0%     | 0%     | 0%     | 0%     | 0.15%  |
| 6 | 0.2.2.2  | <i>unclassified</i>            | 0  | 0.30%  | 0.60%  | 1.07%  | 1.51%  | 0%     | 0%     | 0%     | 0%     | 0%     | 0.07%  | 0.02%  | 0%     | 0.30%  |
| 6 | 0.2.2.2  | <i>Aeromicrobium</i>           | 0  | 0.07%  | 0.15%  | 0.23%  | 0.32%  | 0%     | 0%     | 0%     | 0.06%  | 0%     | 0.07%  | 0.02%  | 0%     | 0%     |
| 6 | 0.2.2.2  | <i>Kribbella</i>               | 0  | 0.02%  | 0.06%  | 0.12%  | 0%     | 0%     | 0%     | 0%     | 0%     | 0%     | 0%     | 0%     | 0.06%  | 0%     |
| 6 | 0.2.2.2  | <i>Nocardioides</i>            | 0  | 0.14%  | 0.22%  | 0.50%  | 0.28%  | 0%     | 0%     | 0.05%  | 0%     | 0.08%  | 0.07%  | 0.05%  | 0%     | 0.45%  |
| 6 | 0.2.2.2  | <i>Actinophytocola</i>         | 0  | 0.01%  | 0.04%  | 0.08%  | 0%     | 0%     | 0%     | 0%     | 0%     | 0%     | 0%     | 0%     | 0%     | 0%     |
| 6 | 0.2.2.2  | <i>Lentzea</i>                 | 0  | 0.13%  | 1.36%  | 0.18%  | 0.05%  | 0%     | 0%     | 0%     | 0%     | 0%     | 0%     | 0%     | 0%     | 0%     |
| 6 | 0.2.2.2  | <i>Streptomyces</i>            | 0  | 0.18%  | 0.59%  | 0.41%  | 0.50%  | 0%     | 0%     | 0.14%  | 0.13%  | 0.08%  | 0%     | 0.25%  | 0%     | 0%     |
| 6 | 0.2.2.2  | <i>Nonomuraea</i>              | 0  | 0.01%  | 0%     | 0.05%  | 0.09%  | 0%     | 0%     | 0%     | 0%     | 0%     | 0%     | 0%     | 0%     | 0%     |
| 6 | 0.2.2.2  | <i>Actinocorallia</i>          | 0  | 0.04%  | 0.04%  | 0.40%  | 0%     | 0%     | 0%     | 0%     | 0%     | 0%     | 0%     | 0%     | 0%     | 0%     |
| 6 | 0.2.2.2  | <i>unclassified</i>            | 0  | 0.03%  | 0.08%  | 0.07%  | 0.05%  | 0%     | 0%     | 0%     | 0%     | 0%     | 0%     | 0%     | 0%     | 0.15%  |
| 6 | 0.2.2.3  | <i>Conexibacter</i>            | 0  | 0.01%  | 0.06%  | 0.07%  | 0.05%  | 0%     | 0%     | 0%     | 0%     | 0%     | 0%     | 0%     | 0%     | 0%     |
| 6 | 0.2.2.3  | <i>unclassified</i>            | 0  | 0.09%  | 0.29%  | 0.35%  | 0.41%  | 0%     | 0%     | 0%     | 0%     | 0%     | 0%     | 0%     | 0%     | 0%     |
| 6 | 0.2.2.4  | <i>unclassified</i>            | 0  | 0.02%  | 0.07%  | 0.08%  | 0.05%  | 0%     | 0%     | 0%     | 0%     | 0%     | 0%     | 0%     | 0%     | 0%     |
| 6 | 0.2.3.1  | <i>Armatimonas</i>             | 0  | 0.01%  | 0%     | 0.03%  | 0.09%  | 0%     | 0%     | 0%     | 0%     | 0%     | 0%     | 0%     | 0%     | 0%     |
| 6 | 0.2.3.2  | <i>unclassified</i>            | 0  | 0.08%  | 0.18%  | 0.43%  | 0.14%  | 0%     | 0%     | 0%     | 0%     | 0%     | 0.07%  | 0.05%  | 0.06%  | 0%     |
| 6 | 0.2.4.1  | <i>Bacteroides</i>             | 0  | 0.05%  | 0.04%  | 0%     | 0%     | 0.15%  | 0%     | 0%     | 0%     | 0.17%  | 0%     | 0%     | 0.19%  | 0%     |
| 6 | 0.2.4.1  | <i>Prevotella</i>              | 0  | 0.01%  | 0%     | 0%     | 0.09%  | 0%     | 0%     | 0%     | 0%     | 0%     | 0%     | 0%     | 0%     | 0%     |
| 6 | 0.2.4.2  | <i>Chryseolinea</i>            | 0  | 0.04%  | 0.10%  | 0.03%  | 0.28%  | 0%     | 0%     | 0%     | 0%     | 0%     | 0%     | 0.10%  | 0%     | 0%     |
| 6 | 0.2.4.2  | <i>Dyadobacter</i>             | 0  | 0.23%  | 0.67%  | 0.84%  | 0.73%  | 0.30%  | 0%     | 0.09%  | 0%     | 0%     | 0.13%  | 0%     | 0%     | 0%     |
| 6 | 0.2.4.2  | <i>Emticicia</i>               | 0  | 0.02%  | 0.15%  | 0.02%  | 0.05%  | 0%     | 0%     | 0%     | 0%     | 0%     | 0%     | 0%     | 0%     | 0%     |
| 6 | 0.2.4.2  | <i>Hymenobacter</i>            | 0  | 0.01%  | 0%     | 0%     | 0%     | 0%     | 0%     | 0.05%  | 0%     | 0%     | 0%     | 0.05%  | 0%     | 0%     |
| 6 | 0.2.4.2  | <i>Larkinella</i>              | 0  | 0%     | 0%     | 0.03%  | 0%     | 0%     | 0%     | 0%     | 0%     | 0%     | 0%     | 0%     | 0%     | 0%     |
| 6 | 0.2.4.2  | <i>Ohtaekwangia</i>            | 0  | 0.14%  | 0.53%  | 0.58%  | 0.46%  | 0%     | 0%     | 0.05%  | 0%     | 0%     | 0%     | 0.02%  | 0%     | 0%     |
| 6 | 0.2.4.2  | <i>unclassified</i>            | 0  | 0.05%  | 0.17%  | 0.33%  | 0%     | 0%     | 0%     | 0.05%  | 0%     | 0%     | 0.07%  | 0%     | 0%     | 0%     |
| 6 | 0.2.4.2  | <i>unclassified</i>            | 0  | 0.02%  | 0.06%  | 0.15%  | 0.05%  | 0%     | 0%     | 0%     | 0%     | 0%     | 0%     | 0%     | 0%     | 0%     |
| 6 | 0.2.4.3  | <i>Fluviicola</i>              | 0  | 0.03%  | 0.15%  | 0.15%  | 0.05%  | 0%     | 0%     | 0%     | 0%     | 0%     | 0%     | 0%     | 0%     | 0%     |
| 6 | 0.2.4.3  | <i>Chryseobacterium</i>        | 0  | 0.30%  | 1.77%  | 0.53%  | 0.64%  | 0.45%  | 0%     | 0%     | 0%     | 0%     | 0.07%  | 0.05%  | 0.06%  | 0%     |
| 6 | 0.2.4.3  | <i>Epilithonimonas</i>         | 0  | 0.13%  | 0.63%  | 0.76%  | 0.09%  | 0%     | 0%     | 0%     | 0%     | 0%     | 0.07%  | 0%     | 0.06%  | 0%     |
| 6 | 0.2.4.3  | <i>Flavobacterium</i>          | 0  | 2.68%  | 9.98%  | 8.24%  | 7.75%  | 3.92%  | 0%     | 0.18%  | 0.19%  | 0.08%  | 0.67%  | 0.57%  | 0.25%  | 0.30%  |



|   |          |                                |   |        |        |        |        |        |        |        |        |        |        |        |        |        |
|---|----------|--------------------------------|---|--------|--------|--------|--------|--------|--------|--------|--------|--------|--------|--------|--------|--------|
| 6 | 0.2.16.1 | <i>unclassified</i>            | 0 | 0.05%  | 0%     | 0.03%  | 0.46%  | 0%     | 0%     | 0.05%  | 0%     | 0%     | 0.07%  | 0%     | 0%     | 0%     |
| 6 | 0.2.16.1 | <i>unclassified</i>            | 0 | 0.03%  | 0.06%  | 0.25%  | 0.05%  | 0%     | 0%     | 0.05%  | 0%     | 0%     | 0%     | 0%     | 0%     | 0%     |
| 6 | 0.2.16.1 | <i>Roseomonas</i>              | 0 | 0.01%  | 0.03%  | 0.10%  | 0.05%  | 0%     | 0%     | 0%     | 0%     | 0%     | 0%     | 0%     | 0%     | 0%     |
| 6 | 0.2.16.1 | <i>unclassified</i>            | 0 | 0%     | 0.01%  | 0.02%  | 0%     | 0%     | 0%     | 0%     | 0%     | 0%     | 0%     | 0%     | 0%     | 0%     |
| 6 | 0.2.16.1 | <i>Azospirillum</i>            | 0 | 0%     | 0.01%  | 0%     | 0.05%  | 0%     | 0%     | 0%     | 0%     | 0%     | 0%     | 0%     | 0%     | 0%     |
| 6 | 0.2.16.1 | <i>Dongia</i>                  | 0 | 0.05%  | 0.22%  | 0.25%  | 0.09%  | 0%     | 0%     | 0%     | 0%     | 0%     | 0%     | 0%     | 0%     | 0%     |
| 6 | 0.2.16.1 | <i>Skermanella</i>             | 0 | 0.02%  | 0.07%  | 0.13%  | 0.09%  | 0%     | 0%     | 0%     | 0%     | 0%     | 0%     | 0%     | 0%     | 0%     |
| 6 | 0.2.16.1 | <i>Candidatus Alysiosphae</i>  | 0 | 0%     | 0.01%  | 0%     | 0.05%  | 0%     | 0%     | 0%     | 0%     | 0%     | 0%     | 0%     | 0%     | 0%     |
| 6 | 0.2.16.1 | <i>Revranella</i>              | 0 | 0.05%  | 0.13%  | 0.23%  | 0.23%  | 0%     | 0%     | 0%     | 0%     | 0%     | 0%     | 0%     | 0%     | 0%     |
| 6 | 0.2.16.1 | <i>unclassified</i>            | 0 | 0.04%  | 0.11%  | 0.26%  | 0.09%  | 0%     | 0%     | 0%     | 0%     | 0.07%  | 0%     | 0%     | 0%     | 0%     |
| 6 | 0.2.16.1 | <i>Porphyrobacter</i>          | 0 | 0.04%  | 0.08%  | 0.08%  | 0.28%  | 0%     | 0%     | 0%     | 0%     | 0%     | 0%     | 0%     | 0%     | 0%     |
| 6 | 0.2.16.1 | <i>Novosphingobium</i>         | 0 | 0.10%  | 0.22%  | 0.21%  | 0.55%  | 0%     | 0%     | 0%     | 0.08%  | 0.07%  | 0%     | 0.06%  | 0%     | 0%     |
| 6 | 0.2.16.1 | <i>Sphingobium</i>             | 0 | 0.16%  | 0.10%  | 0.08%  | 0.14%  | 0%     | 0%     | 0%     | 0.06%  | 0%     | 0%     | 0%     | 1.49%  | 0%     |
| 6 | 0.2.16.1 | <i>Sphingomonas</i>            | 0 | 0.18%  | 0.42%  | 0.68%  | 0.96%  | 0%     | 0%     | 0%     | 0%     | 0.07%  | 0.02%  | 0.06%  | 0%     | 0%     |
| 6 | 0.2.16.1 | <i>Sphingopyxis</i>            | 0 | 0.06%  | 0.18%  | 0.17%  | 0.23%  | 0%     | 0%     | 0%     | 0%     | 0%     | 0%     | 0.13%  | 0%     | 0%     |
| 6 | 0.2.16.1 | <i>unclassified</i>            | 0 | 0.06%  | 0.20%  | 0.07%  | 0.23%  | 0%     | 0%     | 0%     | 0.06%  | 0%     | 0%     | 0.13%  | 0%     | 0%     |
| 6 | 0.2.16.1 | <i>unclassified</i>            | 0 | 0.34%  | 0.10%  | 0.31%  | 0.69%  | 0%     | 0%     | 0%     | 0.19%  | 0.50%  | 2.33%  | 0%     | 0%     | 0%     |
| 6 | 0.2.16.2 | <i>Achromobacter</i>           | 0 | 0.35%  | 0.97%  | 1.44%  | 1.10%  | 0.30%  | 0%     | 0.05%  | 0%     | 0.08%  | 0.13%  | 0.02%  | 0.06%  | 0%     |
| 6 | 0.2.16.2 | <i>Burkholderia</i>            | 0 | 0.05%  | 0.03%  | 0.05%  | 0.09%  | 0%     | 0%     | 0%     | 0%     | 0%     | 0.40%  | 0%     | 0.06%  | 0%     |
| 6 | 0.2.16.2 | <i>Ralstonia</i>               | 0 | 0.02%  | 0%     | 0%     | 0%     | 0%     | 0%     | 0.05%  | 0.06%  | 0%     | 0.07%  | 0.05%  | 0%     | 0%     |
| 6 | 0.2.16.2 | <i>Acidovorax</i>              | 0 | 0.09%  | 0.49%  | 0.28%  | 0%     | 0%     | 0%     | 0%     | 0.06%  | 0.08%  | 0.07%  | 0%     | 0.06%  | 0%     |
| 6 | 0.2.16.2 | <i>Aquabacterium</i>           | 0 | 0.02%  | 0.07%  | 0.05%  | 0.05%  | 0%     | 0%     | 0.05%  | 0%     | 0%     | 0%     | 0%     | 0%     | 0%     |
| 6 | 0.2.16.2 | <i>Comamonas</i>               | 0 | 0.16%  | 0.48%  | 0.18%  | 0.32%  | 0.90%  | 0%     | 0%     | 0%     | 0%     | 0%     | 0%     | 0%     | 0%     |
| 6 | 0.2.16.2 | <i>Delftia</i>                 | 0 | 0.47%  | 0.70%  | 2.61%  | 1.28%  | 0%     | 0%     | 0.09%  | 0%     | 0.17%  | 0.73%  | 0.05%  | 0.06%  | 0%     |
| 6 | 0.2.16.2 | <i>Hydrogenophaga</i>          | 0 | 0.06%  | 0.18%  | 0.17%  | 0.32%  | 0%     | 0%     | 0%     | 0%     | 0%     | 0.07%  | 0%     | 0%     | 0%     |
| 6 | 0.2.16.2 | <i>Mitsuaria</i>               | 0 | 0.02%  | 0.13%  | 0.03%  | 0.05%  | 0%     | 0%     | 0%     | 0%     | 0%     | 0%     | 0%     | 0%     | 0%     |
| 6 | 0.2.16.2 | <i>Pseudorhodofera</i>         | 0 | 0.05%  | 0.22%  | 0.25%  | 0.18%  | 0%     | 0%     | 0%     | 0%     | 0%     | 0%     | 0%     | 0%     | 0%     |
| 6 | 0.2.16.2 | <i>Rhizobacter</i>             | 0 | 0.08%  | 0.35%  | 0.26%  | 0.23%  | 0%     | 0%     | 0%     | 0.06%  | 0%     | 0.07%  | 0%     | 0%     | 0%     |
| 6 | 0.2.16.2 | <i>Variovorax</i>              | 0 | 0.06%  | 0.45%  | 0.15%  | 0.14%  | 0%     | 0%     | 0%     | 0%     | 0%     | 0%     | 0%     | 0%     | 0%     |
| 6 | 0.2.16.2 | <i>unclassified</i>            | 0 | 0.13%  | 0.46%  | 0.38%  | 0.46%  | 0.15%  | 0%     | 0%     | 0%     | 0%     | 0%     | 0.05%  | 0%     | 0%     |
| 6 | 0.2.16.2 | <i>Duganella</i>               | 0 | 0.06%  | 0.32%  | 0.12%  | 0.18%  | 0%     | 0%     | 0%     | 0%     | 0%     | 0%     | 0.05%  | 0%     | 0%     |
| 6 | 0.2.16.2 | <i>Herminiimonas</i>           | 0 | 0.29%  | 0.01%  | 0.02%  | 0%     | 3.46%  | 0%     | 0%     | 0%     | 0%     | 0%     | 0.02%  | 0%     | 0%     |
| 6 | 0.2.16.2 | <i>Janthinobacterium</i>       | 0 | 0.23%  | 0.35%  | 0.83%  | 1.15%  | 0%     | 0%     | 0%     | 0%     | 0.17%  | 0.20%  | 0.07%  | 0%     | 0%     |
| 6 | 0.2.16.2 | <i>Massilia</i>                | 0 | 0.16%  | 0.43%  | 0.68%  | 0.28%  | 0%     | 0%     | 0%     | 0%     | 0%     | 0.40%  | 0%     | 0%     | 0.15%  |
| 6 | 0.2.16.2 | <i>Methylobacillus</i>         | 0 | 0.01%  | 0.04%  | 0.05%  | 0%     | 0%     | 0%     | 0%     | 0%     | 0%     | 0.07%  | 0%     | 0%     | 0%     |
| 6 | 0.2.16.2 | <i>Methylophilus</i>           | 0 | 0.38%  | 0.48%  | 0.40%  | 0.60%  | 2.86%  | 0%     | 0%     | 0.06%  | 0%     | 0.07%  | 0%     | 0.13%  | 0%     |
| 6 | 0.2.16.2 | <i>Methylotenera</i>           | 0 | 0.04%  | 0%     | 0.05%  | 0.18%  | 0.30%  | 0%     | 0%     | 0%     | 0%     | 0%     | 0%     | 0%     | 0%     |
| 6 | 0.2.16.2 | <i>unclassified</i>            | 0 | 0.05%  | 0.29%  | 0.13%  | 0.05%  | 0%     | 0%     | 0%     | 0%     | 0%     | 0%     | 0%     | 0.15%  | 0%     |
| 6 | 0.2.16.2 | <i>Nitrospira</i>              | 0 | 0.02%  | 0.01%  | 0.08%  | 0.09%  | 0%     | 0%     | 0%     | 0%     | 0%     | 0%     | 0%     | 0%     | 0%     |
| 6 | 0.2.16.2 | <i>unclassified</i>            | 0 | 0.12%  | 0.45%  | 0.28%  | 0.32%  | 0.30%  | 0%     | 0%     | 0%     | 0%     | 0%     | 0%     | 0.06%  | 0%     |
| 6 | 0.2.16.2 | <i>unclassified</i>            | 0 | 0.02%  | 0.03%  | 0.12%  | 0%     | 0%     | 0%     | 0.05%  | 0%     | 0%     | 0%     | 0%     | 0%     | 0%     |
| 6 | 0.2.16.2 | <i>unclassified</i>            | 0 | 0.02%  | 0.10%  | 0.10%  | 0.05%  | 0%     | 0%     | 0%     | 0%     | 0%     | 0%     | 0%     | 0%     | 0%     |
| 6 | 0.2.16.3 | <i>Bdellovibrio</i>            | 0 | 0.01%  | 0.06%  | 0.03%  | 0%     | 0%     | 0%     | 0%     | 0%     | 0%     | 0%     | 0%     | 0%     | 0%     |
| 6 | 0.2.16.3 | <i>OM27 clade</i>              | 0 | 0.01%  | 0.04%  | 0.05%  | 0.05%  | 0%     | 0%     | 0%     | 0%     | 0%     | 0%     | 0.02%  | 0%     | 0%     |
| 6 | 0.2.16.3 | <i>Nannocystis</i>             | 0 | 0.04%  | 0.08%  | 0.30%  | 0.05%  | 0%     | 0%     | 0%     | 0%     | 0%     | 0%     | 0%     | 0%     | 0%     |
| 6 | 0.2.16.3 | <i>Byssovorax</i>              | 0 | 0.05%  | 0.25%  | 0.23%  | 0.09%  | 0%     | 0%     | 0%     | 0%     | 0%     | 0%     | 0%     | 0%     | 0%     |
| 6 | 0.2.16.3 | <i>Chondromyces</i>            | 0 | 0.01%  | 0%     | 0.03%  | 0.09%  | 0%     | 0%     | 0%     | 0%     | 0%     | 0%     | 0%     | 0%     | 0%     |
| 6 | 0.2.16.3 | <i>unclassified</i>            | 0 | 0.04%  | 0.13%  | 0.13%  | 0.18%  | 0%     | 0%     | 0%     | 0%     | 0%     | 0%     | 0%     | 0%     | 0%     |
| 6 | 0.2.16.3 | <i>unclassified</i>            | 0 | 0.12%  | 0.25%  | 0.68%  | 0.46%  | 0%     | 0%     | 0.05%  | 0%     | 0%     | 0%     | 0.05%  | 0%     | 0%     |
| 6 | 0.2.16.3 | <i>unclassified</i>            | 0 | 0.01%  | 0.04%  | 0.13%  | 0%     | 0%     | 0%     | 0%     | 0%     | 0%     | 0%     | 0%     | 0%     | 0%     |
| 6 | 0.2.16.4 | <i>Enterobacter</i>            | 0 | 0.43%  | 0.99%  | 2.61%  | 1.10%  | 0%     | 0%     | 0%     | 0%     | 0.08%  | 0.20%  | 0.07%  | 0.06%  | 0%     |
| 6 | 0.2.16.4 | <i>Pantoea</i>                 | 0 | 0.71%  | 2.83%  | 0.43%  | 1.24%  | 1.20%  | 0%     | 0.23%  | 0.13%  | 0.33%  | 0.47%  | 0.20%  | 0.13%  | 1.34%  |
| 6 | 0.2.16.4 | <i>Pectobacterium</i>          | 0 | 0.01%  | 0.01%  | 0.10%  | 0%     | 0%     | 0%     | 0%     | 0%     | 0%     | 0%     | 0%     | 0%     | 0%     |
| 6 | 0.2.16.4 | <i>Serratia</i>                | 0 | 0.25%  | 0.29%  | 0.40%  | 1.15%  | 0.15%  | 0%     | 0.09%  | 0%     | 0.17%  | 0.40%  | 0.12%  | 0.06%  | 0.15%  |
| 6 | 0.2.16.4 | <i>unclassified</i>            | 0 | 0.98%  | 8.87%  | 2.60%  | 0.09%  | 0%     | 0%     | 0.14%  | 0%     | 0%     | 0.07%  | 0.05%  | 0%     | 0%     |
| 6 | 0.2.16.4 | <i>unclassified</i>            | 0 | 0%     | 0%     | 0.03%  | 0%     | 0%     | 0%     | 0%     | 0%     | 0%     | 0%     | 0%     | 0%     | 0%     |
| 6 | 0.2.16.4 | <i>Halomonas</i>               | 0 | 1.52%  | 0.76%  | 0.66%  | 0.09%  | 1.96%  | 1.10%  | 1.60%  | 1.19%  | 2.16%  | 3.73%  | 1.67%  | 2.01%  | 1.34%  |
| 6 | 0.2.16.4 | <i>Pseudospirillum</i>         | 0 | 0.01%  | 0.01%  | 0.08%  | 0%     | 0%     | 0%     | 0%     | 0%     | 0%     | 0%     | 0%     | 0%     | 0%     |
| 6 | 0.2.16.4 | <i>Acinetobacter</i>           | 0 | 0.24%  | 0.31%  | 0.15%  | 0.05%  | 0%     | 0%     | 0.37%  | 0.31%  | 0.17%  | 0.07%  | 0.45%  | 0.13%  | 0.89%  |
| 6 | 0.2.16.4 | <i>Psychrobacter</i>           | 0 | 0.09%  | 0.01%  | 0.05%  | 0%     | 0%     | 0%     | 0.14%  | 0%     | 0%     | 0%     | 0.22%  | 0.25%  | 0.45%  |
| 6 | 0.2.16.4 | <i>Cellvibrio</i>              | 0 | 0.05%  | 0.13%  | 0.08%  | 0.32%  | 0%     | 0%     | 0.05%  | 0%     | 0%     | 0%     | 0.07%  | 0%     | 0%     |
| 6 | 0.2.16.4 | <i>Pseudomonas</i>             | 0 | 2.67%  | 7.78%  | 5.28%  | 9.12%  | 1.36%  | 0%     | 0.46%  | 0.06%  | 0.58%  | 1.53%  | 0.90%  | 2.32%  | 2.68%  |
| 6 | 0.2.16.4 | <i>unclassified</i>            | 0 | 0.01%  | 0.04%  | 0.03%  | 0%     | 0%     | 0%     | 0.05%  | 0%     | 0%     | 0%     | 0.02%  | 0%     | 0%     |
| 6 | 0.2.16.4 | <i>Arenimonas</i>              | 0 | 0.02%  | 0.08%  | 0.02%  | 0.05%  | 0%     | 0%     | 0%     | 0%     | 0%     | 0.07%  | 0%     | 0%     | 0%     |
| 6 | 0.2.16.4 | <i>Dokdonella</i>              | 0 | 0.06%  | 0.08%  | 0.15%  | 0.28%  | 0%     | 0%     | 0.05%  | 0%     | 0.08%  | 0%     | 0.02%  | 0%     | 0%     |
| 6 | 0.2.16.4 | <i>Luteimonas</i>              | 0 | 0.02%  | 0.06%  | 0.10%  | 0.05%  | 0%     | 0%     | 0%     | 0%     | 0%     | 0%     | 0%     | 0%     | 0%     |
| 6 | 0.2.16.4 | <i>Lysobacter</i>              | 0 | 0.01%  | 0.03%  | 0.08%  | 0.05%  | 0%     | 0%     | 0%     | 0%     | 0%     | 0%     | 0%     | 0%     | 0%     |
| 6 | 0.2.16.4 | <i>Pseudofulvimonas</i>        | 0 | 0.01%  | 0.06%  | 0%     | 0.05%  | 0%     | 0%     | 0%     | 0%     | 0%     | 0%     | 0%     | 0%     | 0%     |
| 6 | 0.2.16.4 | <i>Pseudoxanthomonas</i>       | 0 | 0.12%  | 0.31%  | 0.50%  | 0.69%  | 0%     | 0%     | 0%     | 0%     | 0%     | 0%     | 0%     | 0%     | 0%     |
| 6 | 0.2.16.4 | <i>Stenotrophomonas</i>        | 0 | 0.55%  | 1.14%  | 1.72%  | 2.25%  | 0.60%  | 0%     | 0.09%  | 0.06%  | 0.08%  | 0.40%  | 0.10%  | 0.13%  | 0%     |
| 6 | 0.2.16.4 | <i>Xanthomonas</i>             | 0 | 0.01%  | 0%     | 0%     | 0%     | 0%     | 0%     | 0%     | 0%     | 0%     | 0.07%  | 0.05%  | 0%     | 0%     |
| 6 | 0.2.16.4 | <i>unclassified</i>            | 0 | 0.05%  | 0.24%  | 0.28%  | 0.09%  | 0%     | 0%     | 0%     | 0%     | 0%     | 0%     | 0%     | 0%     | 0%     |
| 6 | 0.2.16.4 | <i>Steroidobacter</i>          | 0 | 0.03%  | 0.27%  | 0.13%  | 0%     | 0%     | 0%     | 0%     | 0%     | 0%     | 0%     | 0%     | 0%     | 0%     |
| 6 | 0.2.16.4 | <i>unclassified</i>            | 0 | 0.15%  | 0.31%  | 0.71%  | 0.64%  | 0%     | 0%     | 0.05%  | 0%     | 0%     | 0.07%  | 0%     | 0%     | 0%     |
| 6 | 0.2.16.5 | <i>unclassified</i>            | 0 | 0.06%  | 0.11%  | 0.41%  | 0.18%  | 0%     | 0%     | 0%     | 0%     | 0%     | 0.07%  | 0%     | 0%     | 0%     |
| 6 | 0.2.17.1 | <i>unclassified</i>            | 0 | 0.01%  | 0%     | 0%     | 0%     | 0%     | 0%     | 0%     | 0%     | 0%     | 0.13%  | 0%     | 0%     | 0%     |
| 6 | 0.2.17.2 | <i>unclassified</i>            | 0 | 0.01%  | 0%     | 0.02%  | 0.05%  | 0%     | 0%     | 0%     | 0%     | 0%     | 0%     | 0%     | 0%     | 0%     |
| 6 | 0.2.17.3 | <i>unclassified</i>            | 0 | 0.04%  | 0.17%  | 0.18%  | 0.14%  | 0%     | 0%     | 0%     | 0%     | 0%     | 0%     | 0%     | 0%     | 0%     |
| 6 | 0.2.17.3 | <i>Candidatus Xiphinematob</i> | 0 | 0.02%  | 0.04%  | 0.17%  | 0%     | 0%     | 0%     | 0.05%  | 0%     | 0%     | 0%     | 0%     | 0%     | 0%     |
| 6 | 0.2.17.3 | <i>unclassified</i>            | 0 | 0.01%  | 0%     | 0.07%  | 0%     | 0%     | 0%     | 0%     | 0%     | 0%     | 0%     | 0%     | 0%     | 0%     |
| 6 | 0.2.17.4 | <i>Haloferula</i>              | 0 | 0.02%  | 0.04%  | 0.12%  | 0%     | 0%     | 0%     | 0%     | 0%     | 0%     | 0%     | 0.05%  | 0%     | 0%     |
| 6 | 0.2.17.4 | <i>Luteolibacter</i>           | 0 | 0.01%  | 0.11%  | 0.07%  | 0%     | 0%     | 0%     | 0%     | 0%     | 0%     | 0%     | 0%     | 0%     | 0%     |
| 6 | 0.2.17.4 | <i>Prostheco bacter</i>        | 0 | 0.02%  | 0.10%  | 0.08%  | 0.09%  | 0%     | 0%     | 0%     | 0%     | 0%     | 0%     | 0%     | 0%     | 0%     |
| 6 | 0.2.17.4 | <i>Roseimicrobium</i>          | 0 | 0.10%  | 0.17%  | 0.88%  | 0.18%  | 0%     | 0%     | 0%     | 0%     | 0%     | 0%     | 0%     | 0%     | 0%     |
| 6 | 0.2.17.4 | <i>unclassified</i>            | 0 | 0.11%  | 0.32%  | 0.46%  | 0.28%  | 0%     | 0%     | 0%     | 0%     | 0%     | 0.07%  | 0%     | 0.15%  | 0%     |
| 6 | 0.2.17.5 | <i>unclassified</i>            | 0 | 0.02%  | 0.07%  | 0.18%  | 0%     | 0%     | 0%     | 0%     | 0%     | 0%     | 0%     | 0%     | 0%     | 0%     |
| 6 | 0.2.18.1 | <i>unclassified</i>            | 0 | 61.77% | 17.18% | 14.39% | 20.77% | 68.83% | 97.25% | 80.29% | 91.33% | 64.98% | 55.36% | 69.14% | 86.40% | 75.30% |
| 6 | 0.3.1.1  | <i>unclassified</i>            | 0 | 6.16%  | 0.99%  | 4.12%  | 0.32%  | 0%     | 0.55%  | 5.67%  | 3.20%  | 24.56% | 25.02% | 6.53%  | 2.32%  | 0.60%  |



**Supplementary Table S2 Bacterial communities with significantly difference in abundance at various level in the four four *Allium* species**

|       | taxon               | Average  |    |          |    |          |    |          | Standard error |          |          |          | SAS analysis |        |       |        |
|-------|---------------------|----------|----|----------|----|----------|----|----------|----------------|----------|----------|----------|--------------|--------|-------|--------|
|       |                     | CL       | WO | GA       | ON | CL       | WO | GA       | ON             | LSD      | F        | P        |              |        |       |        |
| Phyla | Proteobacteria      | 42.68029 | a  | 10.31405 | b  | 8.796497 | b  | 9.195527 | b              | 0.843861 | 6.376657 | 3.140546 | 1.880846     | 12.068 | 20.21 | 0.0004 |
|       | Bacteroidetes       | 20.18128 | a  | 2.286857 | b  | 0.775273 | b  | 1.122443 | b              | 1.48161  | 1.953979 | 0.411799 | 0.115158     | 4.0588 | 57.23 | 0.0001 |
|       | unclassified        | 17.44603 | b  | 82.12356 | a  | 70.55562 | a  | 76.9479  | a              | 1.847388 | 8.257203 | 10.75306 | 5.050663     | 23.783 | 16.84 | 0.0008 |
|       | Actinobacteria      | 10.27441 | a  | 1.018407 | b  | 1.398063 | b  | 3.51075  | b              | 1.025543 | 0.566555 | 0.423218 | 2.41194      | 4.4265 | 10    | 0.0044 |
|       | Chloroflexi         | 1.728897 | a  | 0        | b  | 0.07202  | b  | 0.372397 | b              | 0.240851 | 0        | 0.038804 | 0.268168     | 0.5911 | 19.8  | 0.0005 |
|       | Planctomycetes      | 1.58995  | a  | 0.01524  | b  | 0.092957 | b  | 0.124133 | b              | 0.352817 | 0.01524  | 0.020886 | 0.089389     | 0.595  | 17.25 | 0.0007 |
|       | Verrucomicrobia     | 1.324187 | a  | 0.01524  | b  | 0.044357 | b  | 0.091147 | b              | 0.453649 | 0.01524  | 0.044357 | 0.046105     | 0.7474 | 7.74  | 0.0094 |
|       | Firmicutes          | 1.184313 | a  | 2.09257  | a  | 0.36634  | a  | 5.29286  | a              | 0.28939  | 2.017738 | 0.116232 | 4.756644     | 8.4404 | 0.7   | 0.5806 |
| Class | Flavobacteriia      | 11.0066  | a  | 1.647673 | b  | 0.39973  | b  | 0.43223  | b              | 1.170705 | 1.512573 | 0.237623 | 0.098091     | 3.1469 | 28.19 | 0.0001 |
|       | Sphingobacteriia    | 7.228433 | a  | 0.412373 | b  | 0.253687 | b  | 0.569397 | b              | 0.631459 | 0.325238 | 0.14244  | 0.077722     | 1.188  | 87.66 | 0.0001 |
|       | Cytophagia          | 1.741663 | a  | 0.176607 | b  | 0.066533 | b  | 0.05816  | b              | 0.126459 | 0.090755 | 0.066533 | 0.05816      | 0.2919 | 84.44 | 0.0001 |
|       | Deltaproteobacteria | 1.119797 | a  | 0.01524  | b  | 0        | b  | 0.024927 | b              | 0.23457  | 0.01524  | 0        | 0.024927     | 0.3845 | 21.92 | 0.0003 |
|       | Gammaproteobacteria | 19.36104 | a  | 3.22072  | b  | 4.154267 | b  | 5.294513 | b              | 2.642294 | 1.204934 | 1.548722 | 0.839195     | 5.5383 | 20.11 | 0.0004 |
|       | Planctomycetacia    | 1.34555  | a  | 0.01524  | b  | 0.092957 | b  | 0.124133 | b              | 0.288017 | 0.01524  | 0.020886 | 0.089389     | 0.4935 | 17.64 | 0.0007 |
|       | unclassified        | 17.44603 | b  | 82.12356 | a  | 70.55562 | a  | 76.9479  | a              | 1.847388 | 8.257203 | 10.75306 | 5.050663     | 23.783 | 16.84 | 0.0008 |
|       | Thermomicrobia      | 1.209453 | a  | 0        | b  | 0.022177 | b  | 0.272943 | b              | 0.236869 | 0        | 0.022177 | 0.23654      | 0.547  | 11.51 | 0.0028 |
|       | Alphaproteobacteria | 14.3451  | a  | 4.225587 | b  | 3.616273 | b  | 3.522677 | b              | 1.544655 | 2.57704  | 1.000533 | 1.086438     | 5.4591 | 9.98  | 0.0044 |
|       | Actinobacteria      | 9.363293 | a  | 1.018407 | b  | 1.398063 | b  | 3.44453  | b              | 1.010651 | 0.566555 | 0.423218 | 2.37036      | 4.3571 | 8.33  | 0.0077 |
|       | Betaproteobacteria  | 7.618043 | a  | 2.852493 | b  | 1.003777 | b  | 0.353417 | b              | 0.540503 | 2.716473 | 0.633198 | 0.043269     | 4.6333 | 5.34  | 0.0259 |
|       | unclassified        | 1.811217 | b  | 2.073107 | b  | 17.59482 | a  | 3.147983 | b              | 1.16956  | 1.805363 | 7.196836 | 1.762843     | 12.581 | 3.93  | 0.054  |
|       | Bacilli             | 1.124467 | a  | 2.046847 | a  | 0.324463 | a  | 5.267937 | a              | 0.278162 | 1.972026 | 0.141713 | 4.731722     | 8.3742 | 0.71  | 0.571  |
| Order | Flavobacteriales    | 11.0066  | a  | 1.647673 | b  | 0.39973  | b  | 0.43223  | b              | 1.170705 | 1.512573 | 0.237623 | 0.098091     | 3.1469 | 28.19 | 0.0001 |
|       | Sphingobacteriales  | 7.228433 | a  | 0.412373 | b  | 0.253687 | b  | 0.569397 | b              | 0.631459 | 0.325238 | 0.14244  | 0.077722     | 1.188  | 87.66 | 0.0001 |
|       | Xanthomonadales     | 2.90583  | a  | 0.246527 | b  | 0.253687 | b  | 0.09993  | b              | 0.356394 | 0.182294 | 0.14244  | 0.051942     | 0.698  | 40.07 | 0.0001 |
|       | Cytophagales        | 1.741663 | a  | 0.176607 | b  | 0.066533 | b  | 0.05816  | b              | 0.126459 | 0.090755 | 0.066533 | 0.05816      | 0.2919 | 84.44 | 0.0001 |
|       | Pseudomonadales     | 7.78285  | a  | 0.802363 | b  | 0.90686  | b  | 2.79403  | b              | 1.152089 | 0.410652 | 0.361133 | 0.679606     | 2.3563 | 20.5  | 0.0004 |
|       | Planctomycetales    | 1.34555  | a  | 0.01524  | b  | 0.092957 | b  | 0.124133 | b              | 0.288017 | 0.01524  | 0.020886 | 0.089389     | 0.4953 | 17.64 | 0.0007 |
|       | unclassified        | 17.44603 | b  | 82.12356 | a  | 70.55562 | a  | 76.9479  | a              | 1.847388 | 8.257203 | 10.75306 | 5.050663     | 23.783 | 16.84 | 0.0008 |
|       | Burkholderiales     | 6.320587 | a  | 1.682633 | b  | 0.938483 | b  | 0.241157 | b              | 0.587557 | 1.569711 | 0.601965 | 0.050803     | 2.9051 | 9.51  | 0.0051 |
|       | JG30-KF-CM45        | 1.139013 | a  | 0        | b  | 0.022177 | b  | 0.272943 | b              | 0.263452 | 0        | 0.022177 | 0.23654      | 0.5785 | 9.09  | 0.0059 |
|       | Micromonosporales   | 1.42217  | a  | 0        | b  | 0.044357 | b  | 0.22761  | b              | 0.423835 | 0        | 0.044357 | 0.184137     | 0.757  | 8.41  | 0.0074 |
|       | Rhizobiales         | 10.23667 | a  | 4.07946  | b  | 2.40441  | b  | 2.85979  | b              | 0.700138 | 2.495244 | 0.543775 | 0.667644     | 4.453  | 7.07  | 0.0122 |
|       | Sphingomonadales    | 1.62643  | a  | 0        | b  | 0.113897 | b  | 0.629657 | b              | 0.379689 | 0        | 0.015602 | 0.44102      | 0.9493 | 6.49  | 0.0155 |
|       | Enterobacteriales   | 7.57203  | a  | 0.604223 | b  | 0.612537 | b  | 0.729127 | b              | 2.814881 | 0.398117 | 0.290676 | 0.383768     | 4.7016 | 5.77  | 0.0212 |
|       | Corynebacteriales   | 2.32069  | a  | 0.242053 | b  | 0.390997 | b  | 1.06375  | ab             | 0.194799 | 0.131422 | 0.206789 | 0.808079     | 1.413  | 4.78  | 0.0341 |
|       | unclassified        | 1.811217 | b  | 2.073107 | b  | 17.59482 | a  | 3.147983 | b              | 1.16956  | 1.805363 | 7.196836 | 1.762843     | 12.581 | 3.93  | 0.054  |

|                  |                     |                |          |          |          |          |          |          |          |          |          |          |          |          |        |        |        |
|------------------|---------------------|----------------|----------|----------|----------|----------|----------|----------|----------|----------|----------|----------|----------|----------|--------|--------|--------|
|                  | Micrococcales       | 3.46016        | a        | 0.71539  | b        | 0.800217 | b        | 1.825867 | ab       | 0.662724 | 0.436375 | 0.200132 | 1.244846 | 2.4292   | 2.94   | 0.099  |        |
|                  | Bacillales          | 1.11428        | a        | 1.559117 | a        | 0.25917  | a        | 3.96378  | a        | 0.277861 | 1.484453 | 0.116428 | 3.640172 | 6.429    | 0.65   | 0.6056 |        |
| Familiy          | Flavobacteriaceae   | 10.89033       | a        | 1.647673 | b        | 0.39973  | b        | 0.43223  | b        | 1.145682 | 1.512573 | 0.237623 | 0.098091 | 3.1223   | 27.99  | 0.0001 |        |
|                  | Comamonadaceae      | 3.641107       | a        | 0.39713  | b        | 0.435353 | b        | 0.075003 | b        | 0.390601 | 0.330923 | 0.2506   | 0.038223 | 0.9315   | 34.48  | 0.0001 |        |
|                  | Xanthomonadaceae    | 2.77298        | a        | 0.246527 | b        | 0.253687 | b        | 0.09993  | b        | 0.432966 | 0.182294 | 0.14244  | 0.051942 | 0.8049   | 27.25  | 0.0001 |        |
|                  | Chitinophagaceae    | 2.718877       | a        | 0.045723 | b        | 0.043113 | b        | 0.15024  | b        | 0.333616 | 0.045723 | 0.021583 | 0.114896 | 0.5812   | 54.9   | 0.0001 |        |
|                  | Cytophagaceae       | 1.658083       | a        | 0.176607 | b        | 0.066533 | b        | 0.05816  | b        | 0.094522 | 0.090755 | 0.066533 | 0.05816  | 0.2577   | 97.59  | 0.0001 |        |
|                  | unclassified        | 1.596          | a        | 0        | b        | 0.076263 | b        | 0.161637 | b        | 0.239506 | 0        | 0.048384 | 0.070306 | 0.4146   | 35.85  | 0.0001 |        |
|                  | Alcaligenaceae      | 1.16869        | a        | 0.11564  | b        | 0.07202  | b        | 0.029197 | b        | 0.140411 | 0.093714 | 0.038804 | 0.018214 | 0.284    | 39.79  | 0.0001 |        |
|                  | Nocardiaceae        | 1.42572        | a        | 0.095923 | b        | 0.166217 | b        | 0.20293  | b        | 0.188098 | 0.048118 | 0.096034 | 0.122219 | 0.4055   | 26.23  | 0.0002 |        |
|                  | Pseudomonadaceae    | 7.59398        | a        | 0.634707 | b        | 0.724663 | b        | 1.99796  | b        | 1.183455 | 0.393632 | 0.429674 | 0.511167 | 2.3068   | 21.72  | 0.0003 |        |
|                  | Sphingobacteriaceae | 4.24934        | a        | 0.366647 | b        | 0.210573 | b        | 0.419157 | b        | 0.745664 | 0.34404  | 0.136284 | 0.088642 | 1.365    | 21.94  | 0.0003 |        |
|                  | Paenibacillaceae    | 1.02385        | a        | 0        | b        | 0.022177 | b        | 0        | b        | 0.213713 | 0        | 0.022177 | 0        | 0.3504   | 22.39  | 0.0003 |        |
|                  | Planctomycetaceae   | 1.34555        | a        | 0.01524  | b        | 0.092957 | b        | 0.124133 | b        | 0.288017 | 0.01524  | 0.020886 | 0.089389 | 0.4935   | 17.64  | 0.0007 |        |
|                  | unclassified        | 17.44603       | b        | 82.12356 | a        | 70.55562 | a        | 76.9479  | a        | 1.847388 | 8.257203 | 10.75306 | 5.050663 | 23.783   | 16.84  | 0.0008 |        |
|                  | unclassified        | 1.139013       | a        | 0        | b        | 0.022177 | b        | 0.272943 | b        | 0.263452 | 0        | 0.022177 | 0.23654  | 0.5785   | 9.09   | 0.0059 |        |
|                  | Micromonosporaceae  | 1.42217        | a        | 0        | b        | 0.044357 | b        | 0.22761  | b        | 0.423835 | 0        | 0.044357 | 0.184137 | 0.757    | 8.41   | 0.0074 |        |
|                  | Enterobacteriaceae  | 7.57203        | a        | 0.604223 | b        | 0.612537 | b        | 0.729127 | b        | 2.814881 | 0.398117 | 0.290676 | 0.383768 | 4.7016   | 5.77   | 0.0212 |        |
|                  | Rhizobiaceae        | 3.276013       | a        | 1.119657 | b        | 0.185913 | b        | 0.753803 | b        | 0.081765 | 1.096876 | 0.041765 | 0.442979 | 1.9347   | 5.18   | 0.028  |        |
|                  | Sphingomonadaceae   | 1.315273       | a        | 0        | b        | 0.092957 | b        | 0.587887 | ab       | 0.289113 | 0        | 0.020886 | 0.454798 | 0.8794   | 4.99   | 0.0308 |        |
|                  | unclassified        | 1.811217       | b        | 2.073107 | b        | 17.59482 | a        | 3.147983 | b        | 1.16956  | 1.805363 | 7.196836 | 1.762843 | 12.581   | 3.93   | 0.054  |        |
|                  | Microbacteriaceae   | 1.30097        | a        | 0.416847 | ab       | 0.23275  | b        | 0.426497 | ab       | 0.29213  | 0.394208 | 0.157238 | 0.31016  | 0.9806   | 2.54   | 0.1295 |        |
|                  | Hyphomicrobiaceae   | 2.45632        | a        | 1.638123 | b        | 1.033723 | b        | 0.907377 | b        | 0.188521 | 0.850018 | 0.370653 | 0.2983   | 1.6179   | 2.03   | 0.1877 |        |
|                  | Micrococcaceae      | 1.691453       | a        | 0.268057 | a        | 0.517627 | a        | 1.159183 | a        | 0.737811 | 0.146138 | 0.041416 | 0.764539 | 1.7501   | 1.43   | 0.3031 |        |
|                  | Oxalobacteraceae    | 1.454343       | a        | 1.15462  | a        | 0.254927 | a        | 0.099453 | a        | 0.166894 | 1.15462  | 0.178488 | 0.049727 | 1.9261   | 1.27   | 0.3487 |        |
|                  | Genus               | Flavobacterium | 8.653937 | a        | 1.366187 | b        | 0.312257 | b        | 0.373843 | b        | 0.676574 | 1.27583  | 0.179147 | 0.100637 | 2.3785 | 30.29  | 0.0001 |
|                  |                     | unclassified   | 1.596    | a        | 0        | b        | 0.076263 | b        | 0.161637 | b        | 0.239506 | 0        | 0.048384 | 0.070306 | 0.4146 | 35.83  | 0.0001 |
|                  |                     | Rhodococcus    | 1.340387 | a        | 0.045723 | b        | 0.11089  | b        | 0.13671  | b        | 0.141679 | 0.045723 | 0.11089  | 0.08054  | 0.33   | 37.85  | 0.0001 |
| unclassified     |                     | 1.175653       | a        | 0.030483 | b        | 0        | b        | 0.091853 | b        | 0.166069 | 0.030483 | 0        | 0.079714 | 0.3045   | 37.11  | 0.0001 |        |
| Achromobacter    |                     | 1.16869        | a        | 0.11564  | b        | 0.07202  | b        | 0.029197 | b        | 0.140411 | 0.093714 | 0.038804 | 0.018214 | 0.284    | 39.79  | 0.0001 |        |
| Pseudomonas      |                     | 7.392353       | a        | 0.604223 | b        | 0.724663 | b        | 1.964727 | b        | 1.127647 | 0.398117 | 0.429674 | 0.543747 | 2.2537   | 21.53  | 0.0003 |        |
| Devosia          |                     | 1.226903       | a        | 0.281487 | b        | 0.020937 | b        | 0.00831  | b        | 0.140958 | 0.237235 | 0.020937 | 0.00831  | 0.4515   | 17.29  | 0.0007 |        |
| unclassified     |                     | 17.44603       | b        | 82.12356 | a        | 70.55562 | a        | 76.9479  | a        | 1.847388 | 8.257203 | 10.75306 | 5.050663 | 23.783   | 16.84  | 0.0008 |        |
| Stenotrophomonas |                     | 1.700543       | a        | 0.231287 | b        | 0.181667 | b        | 0.075003 | b        | 0.321034 | 0.18743  | 0.108923 | 0.038223 | 0.6347   | 15.12  | 0.001  |        |
| Sphingobacterium |                     | 1.292157       | a        | 0        | b        | 0.08871  | b        | 0.087107 | b        | 0.295904 | 0        | 0.08871  | 0.031072 | 0.5063   | 15.86  | 0.001  |        |
| unclassified     |                     | 1.06352        | a        | 0        | b        | 0.022177 | b        | 0.107517 | b        | 0.262898 | 0        | 0.022177 | 0.095324 | 0.4574   | 13.34  | 0.0018 |        |
| Pedobacter       |                     | 2.827343       | a        | 0.366647 | b        | 0.12186  | b        | 0.29028  | b        | 0.626506 | 0.34404  | 0.061698 | 0.092804 | 1.1796   | 12.68  | 0.0021 |        |
| unclassified     |                     | 1.139013       | a        | 0        | b        | 0.022177 | b        | 0.272943 | b        | 0.263452 | 0        | 0.022177 | 0.23654  | 0.5785   | 9.09   | 0.0059 |        |
| Enterobacter     |                     | 1.569413       | a        | 0        | b        | 0.094197 | b        | 0.045813 | b        | 0.522616 | 0        | 0.057891 | 0.023172 | 0.8582   | 8.39   | 0.0075 |        |
| Delftia          |                     | 1.53245        | a        | 0.030483 | b        | 0.299283 | b        | 0.037503 | b        | 0.565831 | 0.030483 | 0.221537 | 0.019113 | 0.9926   | 5.53   | 0.0236 |        |
| unclassified     |                     | 1.811217       | b        | 2.073107 | b        | 17.59482 | a        | 3.147983 | b        | 1.16956  | 1.805363 | 7.196836 | 1.762843 | 12.581   | 3.93   | 0.054  |        |
| Rhizobium        |                     | 2.687423       | a        | 1.019257 | ab       | 0.185913 | b        | 0.737187 | b        | 0.099887 | 0.996484 | 0.041765 | 0.450355 | 1.7918   | 3.84   | 0.0568 |        |
| unclassified     |                     | 3.85285        | a        | 0.045723 | a        | 0.022177 | a        | 0.016617 | a        | 2.610942 | 0.045723 | 0.022177 | 0.016617 | 4.2583   | 2.15   | 0.1727 |        |

|              |          |   |          |   |          |   |          |   |          |          |          |          |        |      |        |
|--------------|----------|---|----------|---|----------|---|----------|---|----------|----------|----------|----------|--------|------|--------|
| Arthrobacter | 1.638013 | a | 0.161367 | a | 0.164973 | a | 0.95578  | a | 0.763096 | 0.087613 | 0.058696 | 0.720168 | 1.7195 | 1.82 | 0.2215 |
| Pantoea      | 1.49955  | a | 0.477813 | a | 0.307773 | a | 0.554667 | a | 0.705271 | 0.369446 | 0.098923 | 0.392894 | 1.4576 | 1.44 | 0.301  |

Note: Different letters in same row indicate statistically significant differences at the 0.05 probability level according to Fisher' s least significant difference (LSD) test. WO: welsh onion; GA: Garlic; ON: onion.

**Supplementary Table S3 Variance analysis of KEGG pathway in four *Allium* species**

| KEGG_Pathways                        | KEGG pathway                                | Total   | Average  |   |          |   |          |    |          |   | Error    |          |          |          | SAS analysis |      |        |
|--------------------------------------|---------------------------------------------|---------|----------|---|----------|---|----------|----|----------|---|----------|----------|----------|----------|--------------|------|--------|
| Level 1                              | Level 2                                     |         | CL       |   | GA       |   | ON       |    | WO       |   | CL       | WO       | GA       | ON       | LSD          | F    | P      |
| Cellular Processes                   | Cell Communication                          | 24      | 8        | a | 0        | a | 0        | ab | 0        | a | 5.291503 | 0        | 0        | 0        | 8.6283       | 2.29 | 0.1556 |
|                                      | Cell Growth and Death                       | 247576  | 37350.33 | a | 13090    | b | 20254.67 | ab | 11830.33 | b | 9751.028 | 1062.788 | 7215.745 | 5365.046 | 21697        | 3.12 | 0.0882 |
|                                      | Cell Motility                               | 878341  | 165853.7 | a | 47754    | b | 53236    | b  | 25936.67 | b | 46440.33 | 7187.26  | 32787    | 17256.61 | 97579        | 4.42 | 0.0413 |
|                                      | Transport and Catabolism                    | 115531  | 22464    | a | 5624     | b | 6912     | b  | 3510.333 | b | 6445.007 | 761.0587 | 3601.154 | 2127.371 | 12590        | 5.05 | 0.0299 |
| Environmental Information Processing | Membrane Transport                          | 3944197 | 813097   | a | 162994.3 | b | 221384   | b  | 117257   | b | 236358.4 | 16365.92 | 105141.4 | 61830.81 | 434518       | 5.98 | 0.0193 |
|                                      | Signal Transduction                         | 675099  | 135395.3 | a | 30995    | b | 39242.67 | b  | 19400    | b | 39034.37 | 4124.153 | 21483.5  | 11632.48 | 75388        | 5.33 | 0.026  |
|                                      | Signaling Molecules and Interaction         | 40750   | 10813    | a | 883.6667 | b | 1306     | b  | 580.6667 | b | 3072.62  | 121.9021 | 715.9988 | 328.6144 | 5176.1       | 9.74 | 0.0048 |
| Genetic Information Processing       | Folding, Sorting and Degradation            | 869544  | 146674.3 | a | 42480    | b | 64285    | ab | 36408.67 | b | 40893.11 | 3917.739 | 24626.47 | 17260.04 | 83016        | 4    | 0.0519 |
|                                      | Replication and Repair                      | 2719342 | 449350   | a | 132504.3 | b | 206388   | ab | 118205   | b | 124600.3 | 11384.09 | 75256.33 | 54335.34 | 254031       | 3.88 | 0.0556 |
|                                      | Transcription                               | 747399  | 155008.3 | a | 28780    | b | 42476.33 | b  | 22868.33 | b | 44663.21 | 2728.825 | 18411.27 | 11341.74 | 81037        | 6.3  | 0.0168 |
|                                      | Translation                                 | 1810473 | 277619.3 | a | 93980    | b | 146790.7 | ab | 85101    | b | 75836.96 | 7874.69  | 52092.23 | 38833.25 | 163343       | 3.14 | 0.0868 |
|                                      | Amino Acid Metabolism                       | 3347228 | 664903.3 | a | 149086.7 | b | 199079   | b  | 102673.7 | b | 186461.1 | 17109.06 | 94965.96 | 56917.95 | 354700       | 5.73 | 0.0216 |
|                                      | Biosynthesis of Other Secondary Metabolites | 275906  | 59832.67 | a | 10736.67 | b | 14226    | b  | 7173.333 | b | 17003.46 | 1300.601 | 7025.576 | 4040.596 | 30787        | 6.86 | 0.0133 |
|                                      | Carbohydrate Metabolism                     | 3146600 | 639964.3 | a | 136205.3 | b | 181288.7 | b  | 91408.33 | b | 183845.8 | 16248.94 | 90332.75 | 52108    | 345664       | 5.76 | 0.0213 |
|                                      | Energy Metabolism                           | 2074489 | 356667.7 | a | 104804.3 | b | 149371.7 | ab | 80652.67 | b | 99766.1  | 11753.36 | 65727.22 | 41868.94 | 207313       | 3.92 | 0.0544 |
|                                      | Enzyme Families                             | 579570  | 114435.3 | a | 24683.33 | b | 35640.67 | b  | 18430.67 | b | 32646.85 | 2810.607 | 16899.48 | 9769.111 | 62193        | 5.48 | 0.0242 |

|            |                                           |         |          |   |          |   |          |   |          |   |          |          |          |          |        |      |        |
|------------|-------------------------------------------|---------|----------|---|----------|---|----------|---|----------|---|----------|----------|----------|----------|--------|------|--------|
| Metabolism | Glycan Biosynthesis and Metabolism        | 621560  | 123619   | a | 27856.33 | b | 36521.33 | b | 19190    | b | 36272.38 | 3407.973 | 17878.21 | 10678.58 | 68426  | 5.32 | 0.0261 |
|            | Lipid Metabolism                          | 1273720 | 246481.7 | a | 60808.67 | b | 78034.33 | b | 39248.67 | b | 69571.84 | 7722.864 | 39237.74 | 23210.21 | 136212 | 5.16 | 0.0282 |
|            | Metabolism of Cofactors and Vitamins      | 1339142 | 255050   | a | 60921.33 | b | 85277    | b | 45132.33 | b | 71881.38 | 6815.524 | 39074.93 | 23833.46 | 139397 | 5.16 | 0.0283 |
|            | Metabolism of Other Amino Acids           | 576564  | 120269.3 | a | 24224.67 | b | 31694.67 | b | 15999.33 | b | 33808.62 | 2860.099 | 15863.49 | 9148.774 | 62869  | 6.35 | 0.0165 |
|            | Metabolism of Terpenoids and Polyketides  | 708831  | 135925.3 | a | 35234.67 | b | 43828.33 | b | 21288.67 | b | 38123.37 | 4914.375 | 23259    | 13363.85 | 76431  | 4.94 | 0.0316 |
|            | Nucleotide Metabolism                     | 1085365 | 196778.7 | a | 49082.33 | b | 74497    | b | 41430.33 | b | 54972.99 | 4533.755 | 29440.99 | 19742.08 | 106914 | 4.86 | 0.0328 |
|            | Xenobiotics Biodegradation and Metabolism | 1092061 | 236591.7 | a | 45587.67 | b | 55656.67 | b | 26184.33 | b | 65712.45 | 5904.119 | 29990.82 | 16667.34 | 121260 | 6.92 | 0.013  |

Note: Different letters in same row indicate statistically significant differences at the 0.05 probability level according to Fisher' s least significant difference (LSD) test. WO: welsh onion; GA: Garlic; ON: onion.

Supplementary Table S4 KEGG pathway identified in four *Allium* species by PICRUST algorithm

| KEGG_Pathways                       | KEGG pathway                                | KEGG pathway                            | Average                         |         |         |         |         |         |         | Error   |         |         |         | SAS analysis |         |        |        |        |
|-------------------------------------|---------------------------------------------|-----------------------------------------|---------------------------------|---------|---------|---------|---------|---------|---------|---------|---------|---------|---------|--------------|---------|--------|--------|--------|
| Level 1                             | Level 2                                     | Level 3                                 | CL                              | GA      | ON      | WO      | CL      | WO      | GA      | ON      | LSD     | F       | P       |              |         |        |        |        |
| Cellular Processes                  | Cell Communication                          | Adherens junction                       | 2.66667                         | a       | 0       | a       | 0       | a       | 0       | a       | 1.76383 | 0       | 0       | 0            | 2.8761  | 2.29   | 0.1556 |        |
|                                     |                                             | Focal adhesion                          | 2.66667                         | a       | 0       | a       | 0       | a       | 0       | a       | 1.76383 | 0       | 0       | 0            | 2.8761  | 2.29   | 0.1556 |        |
|                                     |                                             | Tight junction                          | 2.66667                         | a       | 0       | a       | 0       | a       | 0       | a       | 1.76383 | 0       | 0       | 0            | 2.8761  | 2.29   | 0.1556 |        |
|                                     | Cell Growth and Death                       | Meiosis - yeast                         | 2799                            | a       | 683     | b       | 867.333 | b       | 382     | b       | 761.935 | 106.785 | 523.334 | 251.291      | 1571.6  | 5.17   | 0.0281 |        |
|                                     |                                             | MAPK signaling                          | 1499.67                         | a       | 523.667 | b       | 950     | ab      | 612.333 | b       | 341.844 | 18.4059 | 220.935 | 226.184      | 759.88  | 3.6    | 0.0654 |        |
|                                     |                                             | Apoptosis                               | 1433.33                         | a       | 525     | b       | 952.333 | ab      | 615     | b       | 321.332 | 18.9297 | 221.101 | 226.581      | 736.18  | 3.32   | 0.0776 |        |
|                                     |                                             | Cell cycle - Caulobacter                | 31618                           | a       | 11358.3 | b       | 17485   | ab      | 10221   | b       | 8331.48 | 939.839 | 6270.73 | 4662.02      | 18688   | 2.94   | 0.0988 |        |
|                                     | Cell Motility                               | Cell cycle                              | 0.33333                         | a       | 0       | a       | 0       | a       | 0       | a       | 0.33333 | 0       | 0       | 0            | 0.5435  | 1      | 0.4411 |        |
|                                     |                                             | Flagellar assembly                      | 33209.3                         | a       | 8570.33 | b       | 9214    | b       | 4563.67 | b       | 9128.93 | 1199.95 | 5820.39 | 3006.77      | 18426   | 5.32   | 0.0261 |        |
|                                     |                                             | Bacterial motility proteins             | 85268.7                         | a       | 24111   | b       | 26123   | b       | 12396.3 | b       | 23977.6 | 3804.45 | 16880.1 | 8631.36      | 50227   | 4.52   | 0.039  |        |
|                                     |                                             | Bacterial chemotaxis                    | 34676.3                         | a       | 10836.7 | b       | 11550.3 | b       | 5421.33 | b       | 9923.9  | 1773.11 | 7566.99 | 3899.62      | 21515   | 3.88   | 0.0556 |        |
|                                     |                                             | Cytoskeleton proteins                   | 12696.7                         | a       | 4236    | b       | 6348.67 | ab      | 3555.33 | b       | 3416.9  | 419.135 | 2532.64 | 1724.32      | 7514.6  | 3.27   | 0.0802 |        |
|                                     |                                             | Regulation of actin cytoskeleton        | 2.66667                         | a       | 0       | a       | 0       | a       | 0       | a       | 1.76383 | 0       | 0       | 0            | 2.8761  | 2.29   | 0.1556 |        |
|                                     |                                             | Transport and Catabolism                | Lysosome                        | 4608.67 | a       | 308.667 | b       | 377.667 | b       | 178     | b       | 1439.14 | 44.5172 | 214.945      | 102.666 | 2379.7 | 8.78   | 0.0065 |
|                                     | Environmental Information Processing        | Membrane Transport                      | Endocytosis                     | 25      | a       | 1       | b       | 4       | b       | 0.33333 | b       | 7.63763 | 1       | 2            | 0.33333 | 12.988 | 8.66   | 0.0068 |
|                                     |                                             |                                         | Phagosome                       | 3       | a       | 0       | b       | 0       | b       | 0       | b       | 1.73205 | 0       | 0            | 0       | 2.8243 | 3      | 0.0951 |
|                                     |                                             |                                         | Peroxisome                      | 17827.3 | a       | 5314.33 | b       | 6530.33 | b       | 3332    | b       | 4999.37 | 725.66  | 3387.91      | 2027.93 | 10455  | 4.13   | 0.481  |
|                                     |                                             |                                         | Transporters                    | 385976  | a       | 66026.3 | b       | 87468   | b       | 44374.3 | b       | 113076  | 6847.02 | 45449.6      | 24634.7 | 203043 | 6.68   | 0.0143 |
|                                     |                                             |                                         | ABC transporters                | 237947  | a       | 45068   | b       | 56688.3 | b       | 28530   | b       | 69768.8 | 5026.01 | 30605.6      | 16531.7 | 127384 | 6.29   | 0.0169 |
|                                     |                                             |                                         | Phosphotransferase system (PTS) | 14988   | a       | 1723.33 | b       | 2590.67 | b       | 979.333 | b       | 5275.81 | 217.801 | 1851.23      | 751.341 | 9205.7 | 5.54   | 0.0236 |
|                                     |                                             |                                         | Secretion system                | 114992  | a       | 31395   | b       | 45543   | b       | 26069.7 | b       | 32102.2 | 2880.07 | 17745.4      | 12349.4 | 63284  | 4.5    | 0.0395 |
| Bacterial secretion system          |                                             |                                         | 59194                           | a       | 18781.7 | b       | 29094   | ab      | 17303.7 | b       | 16340.3 | 1420.8  | 9754.27 | 7631.59      | 33513   | 3.58   | 0.0661 |        |
| Signal Transduction                 |                                             |                                         | MAPK signaling pathway - yeast  | 1852.33 | a       | 104.667 | b       | 210.667 | b       | 95.3333 | b       | 544.308 | 27.205  | 123.734      | 46.2037 | 914.38 | 9.39   | 0.0053 |
|                                     |                                             |                                         | Two component                   | 127127  | a       | 29224.3 | b       | 36316.7 | b       | 17735   | b       | 36715.4 | 3998.91 | 20414.4      | 10904.6 | 71070  | 5.32   | 0.0262 |
|                                     |                                             | Notch signaling pathway                 | 18.6667                         | a       | 0       | b       | 0       | b       | 0.33333 | b       | 8.19214 | 0       | 0       | 0.33333      | 13.369  | 5.12   | 0.0288 |        |
|                                     |                                             | Wnt signaling                           | 18.6667                         | a       | 0       | b       | 0       | b       | 0.33333 | b       | 8.19214 | 0       | 0       | 0.33333      | 13.369  | 5.12   | 0.0288 |        |
|                                     |                                             | Phosphatidylinositol signaling system   | 6357                            | a       | 1648.33 | b       | 2678    | b       | 1554    | b       | 1755.15 | 127.422 | 927.578 | 678.404      | 3427.1  | 4.61   | 0.0373 |        |
|                                     |                                             | VEGF signaling pathway                  | 8.66667                         | a       | 0       | b       | 0       | b       | 0       | b       | 4.25572 | 0       | 0       | 0            | 6.9393  | 4.15   | 0.0478 |        |
|                                     |                                             | mTOR signaling pathway                  | 0.33333                         | a       | 0       | a       | 0       | a       | 0       | a       | 0.33333 | 0       | 0       | 0            | 0.5435  | 1      | 0.4411 |        |
| Signaling Molecules and Interaction |                                             | Calcium signaling pathway               | 13                              | a       | 17.6667 | a       | 37.3333 | a       | 15      | a       | 4.04145 | 5.54777 | 27.5096 | 9.84886      | 48.942  | 0.56   | 0.6568 |        |
|                                     |                                             | Bacterial toxins                        | 4624                            | a       | 408     | b       | 585.333 | b       | 260.333 | b       | 1292.5  | 52.144  | 319.364 | 152.238      | 2186.7  | 9.88   | 0.0046 |        |
|                                     |                                             | Cellular antigens                       | 4740.33                         | a       | 413.333 | b       | 587     | b       | 269.667 | b       | 1343.87 | 54.3026 | 330.654 | 151.943      | 2271.9  | 9.63   | 0.0049 |        |
|                                     |                                             | Ion channels                            | 1431                            | a       | 62.3333 | b       | 132.667 | b       | 50.6667 | b       | 433.851 | 19.3678 | 66.1824 | 25.458       | 717.52  | 9.43   | 0.0053 |        |
|                                     |                                             | Neuroactive ligand-receptor interaction | 5                               | a       | 0       | b       | 0.66667 | b       | 0       | b       | 1.73205 | 0       | 0.66667 | 0            | 3.0262  | 6.74   | 0.014  |        |
|                                     |                                             | Glycan bindng                           | 12                              | a       | 0       | b       | 0.33333 | b       | 0       | b       | 5.2915  | 0       | 0.33333 | 0            | 8.6454  | 5.03   | 0.0301 |        |
|                                     | G protein-coupled receptors                 | 0.66667                                 | a                               | 0       | a       | 0       | a       | 0       | a       | 0.66667 | 0       | 0       | 0       | 1.0871       | 1       | 0.4411 |        |        |
| Folding, Sorting and Degradation    | Ubiquitin system                            | 1230                                    | a                               | 51.6667 | b       | 100.333 | b       | 36.3333 | b       | 366.225 | 14.8474 | 41.434  | 19.6327 | 602.31       | 10.01   | 0.0044 |        |        |
|                                     | Sulfur relay system                         | 20410.3                                 | a                               | 4273    | b       | 5806.67 | b       | 2943.67 | b       | 5853.72 | 507.929 | 2834.13 | 1638.3  | 10968        | 5.83    | 0.0207 |        |        |
|                                     | Proteasome                                  | 2283.67                                 | a                               | 544.333 | b       | 1018.33 | b       | 619     | b       | 610.838 | 36.8978 | 241.182 | 236.635 | 1139.8       | 5.31    | 0.0263 |        |        |
|                                     | RNA degradation                             | 25453.7                                 | a                               | 7021    | b       | 10716   | b       | 6060    | b       | 7069.84 | 645.014 | 4159.71 | 2863.28 | 14206        | 4.26    | 0.045  |        |        |
|                                     | Chaperones and folding catalysts            | 59347                                   | a                               | 16909   | b       | 25375   | b       | 14459.7 | b       | 16672.4 | 1557.57 | 9746.73 | 6836.01 | 33502        | 4.08    | 0.0496 |        |        |
|                                     | Protein processing in endoplasmic reticulum | 4494                                    | a                               | 1506    | b       | 2017.67 | ab      | 1093.67 | b       | 1257.62 | 187.329 | 927.038 | 602.199 | 2747.3       | 3.28    | 0.0797 |        |        |
|                                     | Protein export                              | 33455.7                                 | a                               | 12175   | b       | 19251   | ab      | 11196.3 | b       | 9075.9  | 1000.09 | 6702.33 | 5068.38 | 20234        | 2.74    | 0.113  |        |        |
|                                     | Non-homologous end-joining                  | 4047.33                                 | a                               | 163.333 | b       | 293     | b       | 147.333 | b       | 1121.95 | 47.0791 | 100.271 | 67.8389 | 1841.7       | 11.61   | 0.0028 |        |        |
|                                     | Base excision                               | 27579.7                                 | a                               | 5641.67 | b       | 8982.33 | b       | 5062.67 | b       | 7663.96 | 472.278 | 3208.48 | 2273.3  | 14067        | 6.1     | 0.0183 |        |        |

|                                             |                                   |                                             |         |         |         |         |         |         |         |         |         |         |         |         |        |        |        |
|---------------------------------------------|-----------------------------------|---------------------------------------------|---------|---------|---------|---------|---------|---------|---------|---------|---------|---------|---------|---------|--------|--------|--------|
| Genetic Information Processing              | Replication and Repair            | Nucleotide excision repair                  | 20180.7 | a       | 5542.33 | b       | 8577.67 | b       | 4888    | b       | 5533.48 | 477.586 | 3112.75 | 2261.82 | 11017  | 4.42   | 0.0411 |
|                                             |                                   | DNA repair and recombination proteins       | 149038  | a       | 42130.7 | b       | 65258   | b       | 37297.3 | b       | 41358.2 | 3652.07 | 23933.8 | 17216.3 | 83033  | 4.15   | 0.0478 |
|                                             |                                   | Chromosome                                  | 75300   | a       | 21298   | b       | 31552   | b       | 17502.3 | b       | 21172.5 | 2130.5  | 12989.7 | 8583.96 | 42994  | 4.07   | 0.0499 |
|                                             |                                   | Mismatch repair                             | 40085.3 | a       | 12969.7 | b       | 20713   | ab      | 12022   | b       | 11041.7 | 1041.67 | 7200.9  | 5395.65 | 23288  | 3.32   | 0.0774 |
|                                             |                                   | DNA replication                             | 32851.7 | a       | 11037   | b       | 17690.7 | ab      | 10333.7 | b       | 9020.36 | 866.536 | 6043.2  | 4593.62 | 19275  | 3.13   | 0.0875 |
|                                             |                                   | DNA replication proteins                    | 55666.7 | a       | 18597   | b       | 29650   | ab      | 17218.3 | b       | 15414.6 | 1511.13 | 10343.3 | 7718.45 | 32874  | 3.12   | 0.0879 |
|                                             |                                   | Homologous recombination                    | 44600.3 | a       | 15124.7 | b       | 23671.3 | ab      | 13733.3 | b       | 12301.8 | 1267.43 | 8363.61 | 6247.97 | 26390  | 3.1    | 0.0894 |
|                                             | Transcription                     | Basal transcription factors                 | 267     | a       | 12.3333 | b       | 17.3333 | b       | 7.66667 | b       | 77.3111 | 7.42369 | 6.38575 | 5.36449 | 127.37 | 10.63  | 0.0036 |
|                                             |                                   | Transcription                               | 93580.7 | a       | 14324   | b       | 19626.3 | b       | 9851.67 | b       | 27495.3 | 1509.73 | 10084.5 | 5421.73 | 48628  | 7.09   | 0.0122 |
|                                             |                                   | Transcription                               | 53014.3 | a       | 11377   | b       | 17884   | b       | 10103.7 | b       | 14917.8 | 982.017 | 6698.04 | 4641.22 | 27764  | 5.65   | 0.0224 |
|                                             |                                   | RNA polymerase                              | 8146.33 | a       | 3066.67 | b       | 4948.67 | ab      | 2905.33 | b       | 2187.03 | 240.132 | 1674.69 | 1290.96 | 4975.8 | 2.55   | 0.1289 |
|                                             | Translation                       | mRNA surveillance pathway                   | 108.667 | a       | 2.33333 | b       | 6.33333 | b       | 0       | b       | 34.1435 | 1.85592 | 3.38296 | 0       | 56.028 | 9.5    | 0.0052 |
|                                             |                                   | Ribosome biogenesis in eukaryotes           | 3013    | a       | 820     | b       | 1317.67 | b       | 757.333 | b       | 823.77  | 67.55   | 445.028 | 329.383 | 1622.2 | 4.49   | 0.0397 |
|                                             |                                   | Ribosome Biogenesis                         | 68844.3 | a       | 19995   | b       | 30104   | ab      | 17028.3 | b       | 19218.1 | 1833.02 | 11615.3 | 8086.19 | 39032  | 3.99   | 0.0523 |
|                                             |                                   | Translation factors                         | 26163.7 | a       | 9175.33 | b       | 13904   | ab      | 7979.33 | b       | 7199.18 | 838.209 | 5155.84 | 3756.38 | 15744  | 2.96   | 0.0975 |
|                                             |                                   | Aminoacyl-tRNA biosynthesis                 | 62192.3 | a       | 22198.3 | b       | 34876.3 | ab      | 20326.3 | b       | 16777.2 | 1811.46 | 12155.7 | 9222.61 | 37096  | 2.88   | 0.1028 |
|                                             |                                   | Ribosome                                    | 112969  | a       | 40282.7 | b       | 64922.7 | ab      | 38271.7 | b       | 30464.5 | 3080.99 | 21620.4 | 16872.6 | 67027  | 2.86   | 0.1044 |
|                                             |                                   | RNA                                         | 4328.67 | a       | 1506.33 | ab      | 1659.67 | ab      | 738     | b       | 1329.13 | 270.541 | 1132.23 | 567.884 | 3026.1 | 2.85   | 0.105  |
|                                             | Amino Acid Metabolism             | Phenylalanine                               | 25828   | a       | 4431.67 | b       | 5428.33 | b       | 2723    | b       | 7290.83 | 513.732 | 2801.48 | 1603.17 | 13028  | 7.41   | 0.0107 |
|                                             |                                   | Tyrosine metabolism                         | 29493   | a       | 4675    | b       | 6216.67 | b       | 3014    | b       | 8445.24 | 531.474 | 3292.01 | 1752.57 | 15079  | 7.31   | 0.0112 |
|                                             |                                   | Histidine metabolism                        | 33164   | a       | 5695    | b       | 6933.67 | b       | 3162.33 | b       | 9361    | 789.677 | 4168.87 | 2078.01 | 17098  | 7.17   | 0.0118 |
|                                             |                                   | Arginine and proline metabolism             | 75377   | a       | 12762.7 | b       | 17695.7 | b       | 8862.33 | b       | 21208.5 | 1412.41 | 8735.87 | 4830.39 | 38291  | 7.13   | 0.012  |
|                                             |                                   | Glycine, serine and threonine metabolism    | 60007   | a       | 11234.3 | b       | 15880.3 | b       | 8515.33 | b       | 16721.1 | 1067.73 | 6877.99 | 4292.13 | 30351  | 6.79   | 0.0137 |
|                                             |                                   | Alanine, aspartate and glutamate metabolism | 51348.3 | a       | 9755.67 | b       | 12770   | b       | 6345.33 | b       | 14569.1 | 1173.4  | 6644.66 | 3663.34 | 26853  | 6.52   | 0.0153 |
|                                             |                                   | Cysteine and methionine metabolism          | 48702.3 | a       | 9733    | b       | 13231   | b       | 6567.67 | b       | 14056.1 | 1189.08 | 6806.33 | 3724.87 | 26251  | 5.94   | 0.0197 |
|                                             |                                   | Valine, leucine and isoleucine biosynthesis | 43337.7 | a       | 9291.33 | b       | 13080.7 | b       | 6989    | b       | 12148.8 | 951.056 | 5800.22 | 3609.33 | 22780  | 5.9    | 0.02   |
|                                             |                                   | Phenylalanine, tyrosine and tryptophan      | 38931.3 | a       | 8342.33 | b       | 9951    | b       | 4699    | b       | 11196.7 | 1207.74 | 5854.31 | 3078.19 | 21296  | 5.84   | 0.0205 |
| Tryptophan metabolism                       |                                   | 43740                                       | a       | 10816.7 | b       | 12751.7 | b       | 6117.67 | b       | 12172.2 | 1496.78 | 6873.78 | 3976.45 | 23824   | 5.51   | 0.0239 |        |
| Valine, leucine and isoleucine degradation  |                                   | 62478.7                                     | a       | 17617.3 | b       | 21255.7 | b       | 10475.3 | b       | 17142.3 | 2357.74 | 11028.7 | 6576.22 | 351356  | 4.74   | 0.0349 |        |
| Lysine degradation                          |                                   | 35337                                       | a       | 10025   | b       | 11704.7 | b       | 5625.67 | b       | 9793.56 | 1426.09 | 6317.12 | 3714.01 | 20080   | 4.71   | 0.0356 |        |
| Lysine biosynthesis                         |                                   | 37803.7                                     | a       | 10741   | b       | 15928.7 | b       | 8871.67 | b       | 10482.8 | 1027.69 | 6312.36 | 4320.93 | 21227   | 4.19   | 0.0468 |        |
| Amino acid related enzymes                  |                                   | 79355.3                                     | a       | 23965.7 | b       | 36251   | ab      | 20705.3 | b       | 21928   | 2129.04 | 13587.5 | 9744.98 | 45099   | 3.82   | 0.0575 |        |
| Biosynthesis of Other Secondary Metabolites |                                   | Betalain biosynthesis                       | 279.667 | a       | 18      | b       | 26.3333 | b       | 16.6667 | b       | 68.4211 | 4.72582 | 6.17342 | 7.33333 | 112.92 | 14.04  | 0.0015 |
|                                             |                                   | Isoflavonoid biosynthesis                   | 29.3333 | a       | 1       | b       | 2       | b       | 0.66667 | b       | 7.51295 | 1       | 1.52753 | 0.33333 | 12.619 | 13.22  | 0.0018 |
|                                             |                                   | Caffeine metabolism                         | 333.667 | a       | 18      | b       | 28.6667 | b       | 14      | b       | 85.5031 | 2.88675 | 10.8064 | 7.23418 | 141.1  | 13.14  | 0.0019 |
|                                             |                                   | Indole alkaloid biosynthesis                | 224.333 | a       | 16.3333 | b       | 19.3333 | b       | 16      | b       | 56.9044 | 4.25572 | 7.12585 | 7       | 94.462 | 12.78  | 0.002  |
|                                             |                                   | Chrysin, diarylheptanoid and gingerol       | 2314.33 | a       | 126.667 | b       | 310.333 | b       | 88      | b       | 620.366 | 35.4134 | 102.569 | 50.1431 | 1030.2 | 11.56  | 0.0028 |
|                                             |                                   | beta-Lactam resistance                      | 2327.67 | a       | 97.6667 | b       | 200.667 | b       | 77.3333 | b       | 676.739 | 34.7003 | 111.919 | 38.5155 | 1121.7 | 10.28  | 0.0041 |
|                                             | Flavone and flavonol biosynthesis | 291.333                                     | a       | 10      | b       | 15      | b       | 11      | b       | 91.0793 | 3.21455 | 7.50555 | 5.1316  | 149.34  | 9.3    | 0.0055 |        |
|                                             | Phenylpropanoid                   | 6449.67                                     | a       | 643.333 | b       | 814.667 | b       | 377.667 | b       | 1913.57 | 91.0262 | 468.448 | 231.015 | 3237.8  | 8.68   | 0.0068 |        |
|                                             | Clavulanic acid biosynthesis      | 14                                          | a       | 0.33333 | b       | 1.33333 | b       | 0       | b       | 4.6188  | 0.33333 | 0.66667 | 0       | 7.6288  | 8.32   | 0.0077 |        |

|                                   |                                                            |         |         |         |         |         |         |         |         |         |         |         |         |         |        |        |
|-----------------------------------|------------------------------------------------------------|---------|---------|---------|---------|---------|---------|---------|---------|---------|---------|---------|---------|---------|--------|--------|
|                                   | Penicillin and cephalosporin biosynthesis                  | 4257.33 | a       | 589     | b       | 712.333 | b       | 310.667 | b       | 1226.67 | 89.6047 | 433.84  | 207.992 | 2153.5  | 8      | 0.0086 |
|                                   | Butirosin and neomycin biosynthesis                        | 2689.33 | a       | 340     | b       | 454.333 | b       | 200.333 | b       | 790.704 | 46.6047 | 273.168 | 126.341 | 1381.6  | 7.8    | 0.0092 |
|                                   | Streptomycin biosynthesis                                  | 16601.3 | a       | 3152.67 | b       | 4092    | b       | 2060.67 | b       | 4683.72 | 403.279 | 2104.69 | 1188.51 | 8619.4  | 6.62   | 0.0147 |
|                                   | Tropane, piperidine and pyridine alkaloid biosynthesis     | 9060.67 | a       | 1946    | b       | 2579    | b       | 1357.67 | b       | 2553.34 | 215.818 | 1180.48 | 738.804 | 4755.5  | 6.04   | 0.0188 |
|                                   | Novobiocin biosynthesis                                    | 8413.67 | a       | 1925.67 | b       | 2524.67 | b       | 1352.33 | b       | 2389.43 | 212.863 | 1184.88 | 728.303 | 4521.5  | 5.58   | 0.0232 |
|                                   | Isoquinoline alkaloid biosynthesis                         | 5097.67 | a       | 1337    | b       | 1863.67 | b       | 1024.67 | b       | 1428.33 | 135.015 | 780.947 | 521.604 | 2796    | 4.79   | 0.0339 |
|                                   | Flavonoid biosynthesis                                     | 1448.67 | a       | 515     | ab      | 581.667 | ab      | 265.667 | b       | 417.181 | 95.2593 | 379.027 | 201.397 | 988.27  | 2.89   | 0.102  |
| Carbohydrate Metabolism           | Ascorbate and aldarate metabolism                          | 12608.7 | a       | 687     | b       | 1166    | b       | 489     | b       | 3767.26 | 143.598 | 607.903 | 258.701 | 6241    | 9.57   | 0.005  |
|                                   | Pentose and glucuronate interconversions                   | 27940.3 | a       | 1939.33 | b       | 3114    | b       | 1352.67 | b       | 8493.39 | 298.566 | 1779.99 | 743.199 | 14210   | 8.8    | 0.0065 |
|                                   | Starch and sucrose metabolism                              | 34941.7 | a       | 4085    | b       | 5753    | b       | 2461    | b       | 10432.6 | 583.768 | 3569.95 | 1583.04 | 18189   | 7.7    | 0.0096 |
|                                   | Inositol phosphate metabolism                              | 13370   | a       | 1994.67 | b       | 3247.67 | b       | 1834.33 | b       | 3813.99 | 181.851 | 1122.25 | 769.035 | 6609.5  | 7.48   | 0.0104 |
|                                   | Galactose metabolism                                       | 22854.7 | a       | 3084.33 | b       | 4059    | b       | 1784    | b       | 6870.79 | 421.199 | 2538.66 | 1164.07 | 12113   | 7.22   | 0.0115 |
|                                   | Pentose phosphate pathway                                  | 41893.7 | a       | 7113    | b       | 9069.33 | b       | 4276.33 | b       | 12253.2 | 949.203 | 5244.84 | 2672.74 | 22220   | 6.71   | 0.0142 |
|                                   | Fructose and mannose metabolism                            | 35178   | a       | 5527    | b       | 7440    | b       | 3410.67 | b       | 10538.6 | 724.107 | 4276.59 | 2128.58 | 18904   | 6.65   | 0.0145 |
|                                   | Amino sugar and nucleotide sugar metabolism                | 57682   | a       | 10250   | b       | 13900   | b       | 6663    | b       | 16881.1 | 1323.84 | 7594.51 | 3956.66 | 30941   | 6.34   | 0.0165 |
|                                   | Glycolysis / Gluconeogenesis                               | 63237   | a       | 12805.7 | b       | 18559.3 | b       | 9630.33 | b       | 18107.9 | 1367.66 | 8462.36 | 5037.56 | 33685   | 5.89   | 0.0201 |
|                                   | Pyruvate metabolism                                        | 69488   | a       | 15780   | b       | 21420.3 | b       | 11021.3 | b       | 19804.7 | 1814.65 | 10279.8 | 6069.5  | 37822   | 5.44   | 0.0248 |
|                                   | Glyoxylate and dicarboxylate metabolism                    | 50744   | a       | 12014.3 | b       | 15380   | b       | 7939.67 | b       | 14387.2 | 1424.62 | 7625.26 | 4505.2  | 27646   | 5.41   | 0.0251 |
|                                   | C5-Branched dibasic acid metabolism                        | 19144.7 | a       | 4604.33 | b       | 5963    | b       | 3041.33 | b       | 5398.16 | 556.397 | 2974.09 | 1747.82 | 10485   | 5.3    | 0.0264 |
|                                   | Propanoate metabolism                                      | 64331.7 | a       | 17686   | b       | 21004   | b       | 10168.7 | b       | 17930   | 2462.78 | 11354.2 | 6586.12 | 36455   | 4.78   | 0.0341 |
|                                   | Citrate cycle (TCA cycle)                                  | 54379   | a       | 16042.3 | b       | 24632.3 | ab      | 14203.7 | b       | 14975   | 1302.38 | 8718.91 | 6514.02 | 30261   | 4.02   | 0.0513 |
| Butanoate metabolism              | 72171                                                      | a       | 22592.3 | b       | 26580.7 | b       | 13132.3 | b       | 20267.6 | 3172.6  | 14331.3 | 8463.84 | 43075   | 3.97    | 0.0528 |        |
| Energy Metabolism                 | Sulfur metabolism                                          | 18179   | a       | 2592.67 | b       | 3344.67 | b       | 1500.67 | b       | 5204.28 | 354.782 | 2057.25 | 965.849 | 9278    | 7.68   | 0.0097 |
|                                   | Nitrogen metabolism                                        | 46216   | a       | 9073    | b       | 11373.3 | b       | 5531.67 | b       | 13345.7 | 1165.32 | 6223.75 | 3348.93 | 24698   | 6.25   | 0.0172 |
|                                   | Methane metabolism                                         | 60613.7 | a       | 16411.3 | b       | 19125   | b       | 8979.33 | b       | 17439.7 | 2484.17 | 11345.2 | 6109.74 | 35589   | 4.55   | 0.0384 |
|                                   | Carbon fixation in photosynthetic organisms                | 31419.3 | a       | 8608.33 | b       | 12411.7 | b       | 6819.67 | b       | 8968.06 | 903.326 | 5272.31 | 3439.98 | 17927   | 4.24   | 0.0455 |
|                                   | Oxidative phosphorylation                                  | 91668.7 | a       | 26555.7 | b       | 44274   | ab      | 26251.3 | b       | 24698   | 1855.65 | 14114.4 | 11128.3 | 49900   | 4.06   | 0.0502 |
|                                   | Carbon fixation pathways in prokaryotes                    | 70668   | a       | 24323.3 | b       | 31591   | ab      | 16693   | b       | 19831.2 | 3059.93 | 14931.4 | 9469.94 | 43609   | 3.23   | 0.0823 |
|                                   | Photosynthesis                                             | 18279   | a       | 8205.67 | a       | 12904   | a       | 7125    | a       | 4967.67 | 961.866 | 5467.6  | 3507.79 | 13427   | 1.53   | 0.2796 |
|                                   | Photosynthesis proteins                                    | 19572   | a       | 8763.33 | a       | 13790.3 | a       | 7514.67 | a       | 5330.71 | 1095.36 | 6080.44 | 3764.72 | 14654   | 1.49   | 0.2884 |
| Photosynthesis - antenna proteins | 52                                                         | a       | 271     | a       | 557.667 | a       | 237.333 | a       | 24.0069 | 82.9397 | 410.368 | 152.044 | 727.35  | 0.88    | 0.4921 |        |
| Enzyme Families                   | Cytochrome P450                                            | 66      | a       | 2.33333 | b       | 6       | b       | 0.66667 | b       | 14.5258 | 1.45297 | 1.73205 | 0.33333 | 23.977  | 18.45  | 0.0006 |
|                                   | Peptidases                                                 | 89839.3 | a       | 19291.3 | b       | 28086.7 | b       | 14836.3 | b       | 25535.3 | 2089.11 | 12811.3 | 7675.76 | 48356   | 5.57   | 0.0233 |
|                                   | Protein kinases                                            | 24530   | a       | 5389.67 | b       | 7548    | b       | 3593.67 | b       | 7097.51 | 724.924 | 4090.91 | 2093.15 | 13838   | 5.17   | 0.0282 |
|                                   | Glycosphingolipid biosynthesis - lacto and neolacto series | 24.6667 | a       | 1.33333 | b       | 0.66667 | b       | 2.66667 | b       | 6.56591 | 0.88192 | 0.66667 | 2.66667 | 111.695 | 10.44  | 0.0039 |
|                                   | Other glycan degradation                                   | 6516    | a       | 136     | b       | 299     | b       | 129.667 | b       | 2052.04 | 55.5068 | 152.67  | 63.4621 | 3358.1  | 9.45   | 0.0052 |
|                                   | Glycosphingolipid biosynthesis - ganglio                   | 1459    | a       | 25      | b       | 59.3333 | b       | 28      | b       | 462.667 | 10.9697 | 27.5096 | 13.8684 | 756.3   | 9.4    | 0.0053 |



Metabolism

|                                       |                                                       |         |         |         |     |         |         |         |         |         |         |         |         |        |        |        |
|---------------------------------------|-------------------------------------------------------|---------|---------|---------|-----|---------|---------|---------|---------|---------|---------|---------|---------|--------|--------|--------|
| Glycan Biosynthesis and Metabolism    | Glycosphingolipid biosynthesis - globo                | 2852.33 | a       | 63      | b   | 161.333 | b       | 67.6667 | b       | 907.029 | 24.5561 | 88.9688 | 32.3539 | 1487.6 | 9.13   | 0.0058 |
|                                       | various types of N-glycan                             | 15      | a       | 1.33333 | b   | 1.33333 | b       | 0       | b       | 4.58258 | 0.33333 | 1.33333 | 0       | 7.8011 | 8.77   | 0.0066 |
|                                       | Glycosaminoglycan degradation                         | 2592.33 | a       | 267     | b   | 309.667 | b       | 142     | b       | 816.751 | 38.0832 | 193.267 | 94.8701 | 1378.7 | 7.77   | 0.0093 |
|                                       | N-Glycan biosynthesis                                 | 1997.33 | a       | 350.333 | b   | 453.333 | b       | 192.333 | b       | 575.099 | 57.4524 | 276.821 | 130.314 | 1066.3 | 6.59   | 0.0148 |
|                                       | Lipopolysaccharide biosynthesis proteins              | 27649.3 | a       | 5388.67 | b   | 5758    | b       | 2760.33 | b       | 8388.07 | 810.965 | 3628.6  | 1906.27 | 15280  | 6.11   | 0.0182 |
|                                       | Glycosyltransferases                                  | 21946   | a       | 4720    | b   | 5809.33 | b       | 2855.67 | b       | 6372.06 | 663.042 | 3265.16 | 1792.36 | 12084  | 5.67   | 0.0222 |
|                                       | Lipopolysaccharide biosynthesis                       | 20059.7 | a       | 4493    | b   | 4714.67 | b       | 2278.33 | b       | 6055.03 | 704     | 3017.55 | 1596.46 | 11392  | 5.5    | 0.0241 |
|                                       | Peptidoglycan                                         | 38507.3 | a       | 12410.7 | b   | 18954.7 | ab      | 10733.3 | b       | 10653.9 | 1146.53 | 7260.66 | 5097.69 | 22684  | 3.36   | 0.0759 |
| Lipid Metabolism                      | Arachidonic acid metabolism                           | 4493    | a       | 187     | b   | 376     | b       | 166.333 | b       | 1292.91 | 58.2866 | 193.497 | 79.8798 | 2137.8 | 10.53  | 0.0038 |
|                                       | Linoleic acid                                         | 3761.33 | a       | 353.667 | b   | 484.667 | b       | 218.667 | b       | 1047.25 | 48.1675 | 249.321 | 129.935 | 1769.9 | 9.9    | 0.0045 |
|                                       | Secondary bile acid biosynthesis                      | 349.333 | a       | 20.3333 | b   | 41.6667 | b       | 15.6667 | b       | 108.898 | 5.89727 | 23.1828 | 8.76229 | 182.36 | 8.41   | 0.0074 |
|                                       | Steroid hormone biosynthesis                          | 2630.67 | a       | 313     | b   | 378.333 | b       | 167     | b       | 790.394 | 45.2806 | 190.533 | 110.817 | 1340   | 8.19   | 0.008  |
|                                       | Sphingolipid biosynthesis                             | 6191.67 | a       | 576.667 | b   | 715.667 | b       | 322.333 | b       | 1918.12 | 85.7483 | 432.744 | 214.588 | 3228.3 | 8.18   | 0.0081 |
|                                       | biosynthesis of unsaturated                           | 17774.7 | a       | 2332.33 | b   | 3339.67 | b       | 1677.33 | b       | 5097.59 | 250.156 | 1535.58 | 880.276 | 8808.4 | 8.11   | 0.0083 |
|                                       | Glycerolipid metabolism                               | 20645   | a       | 4067.67 | b   | 5395.33 | b       | 2526.33 | b       | 5956.54 | 532.942 | 2928.57 | 1546.51 | 11147  | 6.05   | 0.0187 |
|                                       | Ether lipid metabolism                                | 1074.33 | a       | 249.667 | b   | 259.333 | b       | 122.333 | b       | 306.167 | 39.8595 | 158.474 | 88.7888 | 584.12 | 5.94   | 0.0197 |
|                                       | Primary bile acid biosynthesis                        | 1093.67 | a       | 266.333 | b   | 299.333 | b       | 127.667 | b       | 304.126 | 40.4159 | 172.86  | 98.1026 | 596.07 | 5.73   | 0.0216 |
|                                       | Fatty acid biosynthesis                               | 35184.7 | a       | 8155.33 | b   | 11766.7 | b       | 6330.33 | b       | 9834.61 | 839.222 | 5157.16 | 3231.04 | 18908  | 5.35   | 0.0258 |
|                                       | Fatty acid elongation in mitochondria                 | 36.3333 | a       | 0       | b   | 0.66667 | b       | 0       | b       | 15.6454 | 0       | 0.66667 | 0       | 25.534 | 5.32   | 0.0262 |
|                                       | Linolenic acid                                        | 3024.33 | a       | 758.667 | b   | 815.333 | b       | 377.333 | b       | 898.869 | 119.834 | 501.282 | 272.349 | 1746.9 | 5.04   | 0.03   |
|                                       | Lipid biosynthesis proteins synthesis and degradation | 53023   | a       | 14647   | b   | 19065.3 | b       | 9781.67 | b       | 14819.7 | 1838.93 | 9300.31 | 5648.27 | 30129  | 4.52   | 0.0392 |
|                                       | Glycerophospholipid metabolism                        | 11410.7 | a       | 3508.33 | b   | 3773    | b       | 1713    | b       | 3176.29 | 559.966 | 2332.14 | 1273.65 | 6814.1 | 4.24   | 0.0435 |
|                                       | Fatty acid metabolism                                 | 32082   | a       | 8694    | b   | 12936.3 | b       | 7205.67 | b       | 9065.25 | 817.007 | 5212.27 | 3514.38 | 18037  | 4.32   | 0.0435 |
|                                       | Steroid biosynthesis                                  | 52570.3 | a       | 16210.7 | b   | 17887   | b       | 8268    | b       | 14652.8 | 2542.72 | 10558.5 | 5961.04 | 31288  | 4.21   | 0.0463 |
| Vitamin B6 metabolism                 | 1136.67                                               | a       | 468     | ab      | 500 | ab      | 229     | b       | 333.651 | 86.3732 | 336.149 | 186.806 | 842.05  | 2.26   | 0.1586 |        |
| Metabolism of Cofactors and Vitamins  | Retinol metabolism                                    | 10064   | a       | 1323.33 | b   | 1693.67 | b       | 766.333 | b       | 2916.44 | 172.455 | 1002.73 | 479.678 | 5097   | 7.99   | 0.0086 |
|                                       | Folate biosynthesis                                   | 5547.67 | a       | 924     | b   | 1183    | b       | 526.667 | b       | 1568.76 | 124.557 | 680.615 | 342.898 | 2851.1 | 7.23   | 0.0115 |
|                                       | Nicotinate and nicotinamide metabolism                | 24583.3 | a       | 4223.67 | b   | 5924    | b       | 3014    | b       | 6943.19 | 484.061 | 2858.34 | 1613.79 | 12548  | 6.98   | 0.0127 |
|                                       | Thiamine metabolism                                   | 23270.7 | a       | 4007.33 | b   | 5238    | b       | 2554.67 | b       | 6643.07 | 487.273 | 2790.26 | 1490.1  | 12024  | 6.97   | 0.0128 |
|                                       | Biotin metabolism                                     | 20301   | a       | 3575.33 | b   | 4812    | b       | 2301.33 | b       | 5891.71 | 469.013 | 2630.57 | 1364.93 | 10781  | 6.5    | 0.0154 |
|                                       | Riboflavin metabolism                                 | 8291.67 | a       | 1730.67 | b   | 2401.67 | b       | 1269.33 | b       | 2320.89 | 196.673 | 1108.95 | 671.02  | 4346.5 | 6.05   | 0.0187 |
|                                       | Pantothenate and CoA biosynthesis                     | 15653.7 | a       | 3355    | b   | 4623.67 | b       | 2460.33 | b       | 4376.09 | 376.091 | 2093.91 | 1298.63 | 8211.9 | 5.97   | 0.0194 |
|                                       | Lipoic acid metabolism                                | 32613.7 | a       | 6860    | b   | 9133    | b       | 4690.67 | b       | 9278.83 | 801.436 | 4531.68 | 2616    | 17419  | 5.91   | 0.0199 |
|                                       | Porphyrin and chlorophyll                             | 4341.33 | a       | 1125    | b   | 2120.67 | ab      | 1286    | b       | 1187.36 | 71.9236 | 588.947 | 495.227 | 2310.1 | 4.37   | 0.0423 |
|                                       | one carbon pool by                                    | 56428.7 | a       | 16580   | b   | 23201   | b       | 12430.3 | b       | 15696.1 | 1899.76 | 10554.8 | 6561.34 | 32792  | 3.96   | 0.0531 |
|                                       | Ubiquinone and other terpenoid-quinone biosynthesis   | 29432.3 | a       | 8875.33 | b   | 12527.3 | ab      | 6895    | b       | 8164.82 | 936.397 | 5310.54 | 3522.37 | 16957  | 3.9    | 0.0549 |
|                                       | D-Arginine and D-ornithine metabolism                 | 24522   | a       | 8341.67 | b   | 12419   | ab      | 6937.67 | b       | 6921.31 | 845.397 | 4978.55 | 3393.14 | 15026  | 3.01   | 0.0947 |
| D-Arginine and D-ornithine metabolism | 476                                                   | a       | 20.6667 | b       | 43  | b       | 23.3333 | b       | 138.698 | 2.96273 | 24.0278 | 11.4066 | 230.33  | 10.03  | 0.0044 |        |

|                                           |                                                                  |         |   |         |   |         |    |         |   |         |         |         |         |        |       |        |
|-------------------------------------------|------------------------------------------------------------------|---------|---|---------|---|---------|----|---------|---|---------|---------|---------|---------|--------|-------|--------|
| Metabolism of Other Amino Acids           | Cyanoamino acid metabolism                                       | 14205   | a | 1473.67 | b | 2425.33 | b  | 1243.33 | b | 4108.61 | 169.564 | 1037.27 | 578.23  | 6979.2 | 8.59  | 0.007  |
|                                           | Phosphonate and phosphinate metabolism                           | 4015.67 | a | 623.667 | b | 729.333 | b  | 354.333 | b | 1169.57 | 74.2099 | 443.886 | 219.779 | 2074.6 | 7.4   | 0.0108 |
|                                           | Glutathione metabolism                                           | 27226.7 | a | 4679.67 | b | 6746.33 | b  | 3683    | b | 7508.98 | 447.9   | 2927.86 | 1794.2  | 13483  | 7.3   | 0.0112 |
|                                           | Taurine and hypotaurine metabolism                               | 7619    | a | 1243.67 | b | 1536    | b  | 680.667 | b | 2184.59 | 168.272 | 934.409 | 456.346 | 3954.7 | 7.19  | 0.0117 |
|                                           | D-Alanine metabolism                                             | 4755.33 | a | 874     | b | 1039.33 | b  | 479.667 | b | 1377.21 | 123.964 | 646.911 | 323.671 | 2544.6 | 6.52  | 0.0153 |
|                                           | beta-Alanine metabolism                                          | 32604.7 | a | 8281.33 | b | 9149.67 | b  | 4154    | b | 9077.77 | 1231.2  | 5409.89 | 2990.45 | 18020  | 5.44  | 0.0247 |
|                                           | Selenocompound metabolism                                        | 22201.3 | a | 5146    | b | 7107.67 | b  | 3720.33 | b | 6246.52 | 580.452 | 3367.64 | 2023.96 | 12070  | 5.34  | 0.0259 |
|                                           | D-Glutamine and D-glutamate metabolism                           | 7165.67 | a | 1882    | b | 2918    | b  | 1660.67 | b | 2007.37 | 166.689 | 1090.6  | 767.135 | 3938.9 | 4.51  | 0.0393 |
| Metabolism of Terpenoids and Polyketides  | Biosynthesis of type II polyketide backbone                      | 75.3333 | a | 0.33333 | b | 4       | b  | 0.33333 | b | 14.0515 | 0.33333 | 2.64575 | 0.33333 | 23.328 | 26.65 | 0.0002 |
|                                           | Biosynthesis of type II polyketide products                      | 16.6667 | a | 0       | b | 1.33333 | b  | 0.33333 | b | 4.33333 | 0       | 0.88192 | 0.33333 | 7.2312 | 13.26 | 0.0018 |
|                                           | Sesquiterpenoid                                                  | 26      | a | 0.33333 | b | 3       | b  | 0.33333 | b | 8.14453 | 0.33333 | 3       | 0.33333 | 14.174 | 8.21  | 0.008  |
|                                           | Biosynthesis of siderophore group nonribosomal                   | 4407    | a | 371.667 | b | 551     | b  | 223.667 | b | 1406.72 | 51.2423 | 304.073 | 132.58  | 2358.2 | 7.78  | 0.0093 |
|                                           | Tetracycline biosynthesis                                        | 7400.33 | a | 1213.33 | b | 1548.33 | b  | 698     | b | 2134.06 | 174.883 | 1006.04 | 462.237 | 3930.6 | 6.8   | 0.0136 |
|                                           | Polyketide sugar unit biosynthesis                               | 8436.67 | a | 1675    | b | 1922    | b  | 899     | b | 2382.67 | 264.727 | 1187.18 | 615.388 | 4476   | 6.49  | 0.0155 |
|                                           | Biosynthesis of ansamycins                                       | 4468.33 | a | 815     | b | 901     | b  | 411.667 | b | 1366.48 | 121.006 | 572.402 | 291.185 | 2469.9 | 6.24  | 0.0172 |
|                                           | Limone and pinene degradation                                    | 27563.3 | a | 6247    | b | 7221.67 | b  | 3186.67 | b | 7572.31 | 914.123 | 4141.3  | 2274.1  | 14630  | 6.17  | 0.0178 |
|                                           | Carotenoid biosynthesis                                          | 2464.67 | a | 433.667 | b | 722.333 | b  | 284.333 | b | 687.345 | 91.6958 | 485.656 | 192.825 | 1415.8 | 5.4   | 0.0252 |
|                                           | Biosynthesis of vancomycin group antibiotics                     | 2892    | a | 782.333 | b | 850.667 | b  | 391.667 | b | 813.071 | 135.327 | 540.904 | 285.996 | 1673.9 | 4.82  | 0.0335 |
|                                           | Terpenoid backbone biosynthesis                                  | 28714.3 | a | 7701.33 | b | 9938.33 | b  | 4952    | b | 8061.03 | 1034.36 | 5092.74 | 2959.42 | 16366  | 4.62  | 0.0371 |
|                                           | Geraniol degradation                                             | 27560.3 | a | 9154.33 | b | 9648.33 | b  | 4357.33 | b | 7670.19 | 1505.98 | 5882.18 | 3336.42 | 16854  | 3.9   | 0.055  |
|                                           | Prenyltransferases                                               | 19649   | a | 6060.67 | b | 9253    | ab | 5154    | b | 5423.66 | 598.991 | 3646.18 | 2498.17 | 11450  | 3.53  | 0.066  |
|                                           | Zeatin biosynthesis                                              | 2201.33 | a | 764     | b | 1227.33 | ab | 723.667 | b | 596.204 | 58.6884 | 409.159 | 318.85  | 1292.2 | 3.01  | 0.0946 |
|                                           | Biosynthesis of 12-, 14- and 16-membered macrolides              | 50      | a | 15.6667 | b | 36      | b  | 5.66667 | b | 25.9422 | 5.36449 | 26.0832 | 5.66667 | 61.32  | 1.13  | 0.395  |
| Nucleotide Metabolism                     | Purine metabolism                                                | 114751  | a | 26701.7 | b | 39639.3 | b  | 21664.3 | b | 32134.5 | 2595.16 | 16418   | 10601.4 | 61474  | 5.29  | 0.0265 |
|                                           | Pyrimidine metabolism                                            | 82027.7 | a | 22380.7 | b | 34857.7 | b  | 19766   | b | 22839.3 | 1938.73 | 13030.4 | 9142.27 | 45504  | 4.3   | 0.0439 |
| Xenobiotics Biodegradation and Metabolism | Fluorobenzoate degradation                                       | 3925    | a | 187.333 | b | 330.667 | b  | 142.667 | b | 1059.65 | 42.3491 | 130.052 | 70.2385 | 1746   | 11.99 | 0.0025 |
|                                           | Xylene degradation                                               | 3189.33 | a | 122.333 | b | 200     | b  | 82.6667 | b | 900.048 | 44.2505 | 58.3467 | 39.4307 | 1473.9 | 11.43 | 0.0029 |
|                                           | Bisphenol degradation                                            | 8089.67 | a | 564     | b | 930     | b  | 376.667 | b | 2182.85 | 109.162 | 346.68  | 204.244 | 3623.7 | 11.33 | 0.003  |
|                                           | Atrazine degradation                                             | 3774.33 | a | 219.667 | b | 370.667 | b  | 183.333 | b | 1054.1  | 51.7472 | 149.122 | 84.9948 | 1743.5 | 10.48 | 0.0034 |
|                                           | Dioxin degradation                                               | 4423.67 | a | 190.333 | b | 308.333 | b  | 145     | b | 1286.66 | 67.2343 | 119.892 | 68.942  | 2113   | 10.56 | 0.0037 |
|                                           | Chlorocyclohexane and chlorobenzene degradation                  | 6963    | a | 634     | b | 913.667 | b  | 413     | b | 1892.73 | 77.7775 | 453.717 | 223.393 | 3197.1 | 10.4  | 0.0039 |
|                                           | 1,1,1-Trichloro-2,2-bis(4-chlorophenyl) ethane (DDT) degradation | 276     | a | 5       | b | 11.6667 | b  | 4.66667 | b | 86.1568 | 3.05505 | 3.1798  | 2.60342 | 140.73 | 9.71  | 0.0048 |
|                                           | Polycyclic aromatic hydrocarbon degradation                      | 10040.3 | a | 1334    | b | 1764.33 | b  | 772     | b | 2789.92 | 174.138 | 908.184 | 483.357 | 4857   | 8.7   | 0.0067 |
|                                           | Drug metabolism - other enzymes                                  | 12838.7 | a | 1464.33 | b | 1962.33 | b  | 881     | b | 3700.69 | 176.409 | 1099.7  | 521.862 | 6358.9 | 8.6   | 0.0069 |
|                                           | Styrene degradation                                              | 6932    | a | 974.333 | b | 1150    | b  | 553.667 | b | 1951.2  | 106.703 | 627.902 | 337.943 | 3391.9 | 8.49  | 0.0072 |
|                                           | Metabolism of xenobiotics by cytochrome P450                     | 11549   | a | 1723.33 | b | 2531.33 | b  | 1382.33 | b | 3101.91 | 158.884 | 1062.71 | 659.557 | 5459.8 | 8.42  | 0.0074 |

|                                           |         |   |         |   |         |   |         |   |         |         |         |         |        |      |        |
|-------------------------------------------|---------|---|---------|---|---------|---|---------|---|---------|---------|---------|---------|--------|------|--------|
| Drug metabolism - cytochrome P450         | 12701.7 | a | 1999    | b | 2865    | b | 1521.67 | b | 3410.79 | 194.634 | 1264.46 | 762.332 | 6068.7 | 8.16 | 0.0081 |
| Chloroalkane and chloroalkene degradation | 17573   | a | 2663.33 | b | 3489.33 | b | 1510    | b | 4891.41 | 359.266 | 2005.91 | 980.174 | 8787   | 7.86 | 0.0091 |
| Ethylbenzene degradation                  | 5772    | a | 1127.33 | b | 1421    | b | 636.333 | b | 1613.8  | 150.751 | 891.872 | 434.812 | 3098.8 | 6.26 | 0.0171 |
| Aminobenzoate                             | 30681.3 | a | 6836.33 | b | 7856    | b | 3510.33 | b | 8534.95 | 994.601 | 4623.5  | 2499.64 | 16424  | 6.11 | 0.0183 |
| Naphthalene degradation                   | 17709.7 | a | 3830.67 | b | 4527.67 | b | 2029    | b | 4938.41 | 549.396 | 2702.12 | 1420.31 | 9509.1 | 6.1  | 0.0189 |
| Toluene degradation                       | 13908.3 | a | 3287.33 | b | 5226    | b | 3053.67 | b | 3818.08 | 247.818 | 1691.94 | 1326.17 | 7156.2 | 5.44 | 0.0247 |
| Benzoate degradation                      | 41036   | a | 10856.3 | b | 11830.3 | b | 5365.67 | b | 11483   | 1656.14 | 7123.99 | 3915.52 | 23099  | 5.16 | 0.0282 |
| Caprolactam degradation                   | 18923.3 | a | 5565.67 | b | 5894.67 | b | 2665.67 | b | 5242    | 879.426 | 3485.62 | 2007.67 | 10869  | 4.74 | 0.0349 |
| Nitrotoluene degradation                  | 6285.33 | a | 2003    | b | 2073.67 | b | 955     | b | 1835.53 | 328.087 | 1311.87 | 729.521 | 3903.2 | 3.89 | 0.0553 |

Note: Different letters in same row indicate statistically significant differences at the 0.05 probability level according to Fisher's least significant difference (LSD) test.  
WO: welsh onion; GA: Garlic; ON: onion.

**Supplementary Table S5 Correlation of the 20 bacterial genera (>1.0%) and the 23 KEGG categories**

| Code | Bacteria                                              | KEGG pathway                                | correlation  | P value   |
|------|-------------------------------------------------------|---------------------------------------------|--------------|-----------|
| 1    | g unclassified;p unclassified                         | Membrane Transport                          | -0.741059258 | 0.0058214 |
| 2    | g unclassified;p unclassified                         | Amino Acid Metabolism                       | -0.728751974 | 0.0071774 |
| 3    | g unclassified;p unclassified                         | Carbohydrate Metabolism                     | -0.731037408 | 0.0069093 |
| 4    | g unclassified;p unclassified                         | Metabolism of Cofactors and Vitamins        | -0.711985643 | 0.0093896 |
| 5    | g unclassified;p unclassified                         | Lipid Metabolism                            | -0.708113528 | 0.0099656 |
| 6    | g unclassified;p unclassified                         | Xenobiotics Biodegradation and Metabolism   | -0.755629474 | 0.0044763 |
| 7    | g unclassified;p unclassified                         | Nucleotide Metabolism                       | -0.705329811 | 0.0103956 |
| 8    | g unclassified;p unclassified                         | Transcription                               | -0.751916567 | 0.004794  |
| 9    | g unclassified;p unclassified                         | Signal Transduction                         | -0.713444827 | 0.0091791 |
| 10   | g unclassified;p unclassified                         | Glycan Biosynthesis and Metabolism          | -0.720377588 | 0.0082269 |
| 11   | g unclassified;p unclassified                         | Enzyme Families                             | -0.723080825 | 0.0078763 |
| 12   | g unclassified;p unclassified                         | Metabolism of Other Amino Acids             | -0.745403718 | 0.0053922 |
| 13   | g unclassified;p unclassified                         | Biosynthesis of Other Secondary Metabolites | -0.760912998 | 0.0040519 |
| 14   | g unclassified;p unclassified                         | Transport and Catabolism                    | -0.704814906 | 0.0104767 |
| 15   | g unclassified;p unclassified                         | Signaling Molecules and Interaction         | -0.813329792 | 0.0012927 |
| 16   | g Flavobacterium;p Bacteroidetes                      | Membrane Transport                          | 0.824377825  | 0.0009719 |
| 17   | g Flavobacterium;p Bacteroidetes                      | Amino Acid Metabolism                       | 0.820585427  | 0.0010741 |
| 18   | g Flavobacterium;p Bacteroidetes                      | Carbohydrate Metabolism                     | 0.821807339  | 0.0010403 |
| 19   | g Flavobacterium;p Bacteroidetes                      | Metabolism of Cofactors and Vitamins        | 0.804002117  | 0.0016222 |
| 20   | g Flavobacterium;p Bacteroidetes                      | Lipid Metabolism                            | 0.809072159  | 0.001436  |
| 21   | g Flavobacterium;p Bacteroidetes                      | Xenobiotics Biodegradation and Metabolism   | 0.847724932  | 0.0004964 |
| 22   | g Flavobacterium;p Bacteroidetes                      | Nucleotide Metabolism                       | 0.788300285  | 0.0023181 |
| 23   | g Flavobacterium;p Bacteroidetes                      | Cell Motility                               | 0.797443327  | 0.0018899 |
| 24   | g Flavobacterium;p Bacteroidetes                      | Transcription                               | 0.827371584  | 0.0008966 |
| 25   | g Flavobacterium;p Bacteroidetes                      | Metabolism of Terpenoids and Polyketides    | 0.804553739  | 0.0016011 |
| 26   | g Flavobacterium;p Bacteroidetes                      | Signal Transduction                         | 0.81648404   | 0.0011938 |
| 27   | g Flavobacterium;p Bacteroidetes                      | Glycan Biosynthesis and Metabolism          | 0.815689524  | 0.0012182 |
| 28   | g Flavobacterium;p Bacteroidetes                      | Enzyme Families                             | 0.811056385  | 0.0013678 |
| 29   | g Flavobacterium;p Bacteroidetes                      | Metabolism of Other Amino Acids             | 0.834838013  | 0.0007284 |
| 30   | g Flavobacterium;p Bacteroidetes                      | Biosynthesis of Other Secondary Metabolites | 0.844452033  | 0.0005489 |
| 31   | g Flavobacterium;p Bacteroidetes                      | Transport and Catabolism                    | 0.81090543   | 0.0013729 |
| 32   | g Flavobacterium;p Bacteroidetes                      | Signaling Molecules and Interaction         | 0.877111303  | 0.0001789 |
| 33   | g Flavobacterium;p Bacteroidetes                      | Folding, Sorting and Degradation            | 0.755420945  | 0.0044937 |
| 34   | g Flavobacterium;p Bacteroidetes                      | Energy Metabolism                           | 0.758419366  | 0.0042482 |
| 35   | g Flavobacterium;p Bacteroidetes                      | Replication and Repair                      | 0.746447632  | 0.0052927 |
| 36   | g Flavobacterium;p Bacteroidetes                      | Translation                                 | 0.701815431  | 0.0109581 |
| 37   | g unclassified;c Gammaproteobacteria;p Proteobacteria | Membrane Transport                          | 0.794824493  | 0.0020058 |
| 38   | g unclassified;c Gammaproteobacteria;p Proteobacteria | Amino Acid Metabolism                       | 0.795213678  | 0.0019883 |
| 39   | g unclassified;c Gammaproteobacteria;p Proteobacteria | Carbohydrate Metabolism                     | 0.792640395  | 0.0021065 |
| 40   | g unclassified;c Gammaproteobacteria;p Proteobacteria | Metabolism of Cofactors and Vitamins        | 0.790234662  | 0.0022219 |
| 41   | g unclassified;c Gammaproteobacteria;p Proteobacteria | Lipid Metabolism                            | 0.786618113  | 0.0024044 |
| 42   | g unclassified;c Gammaproteobacteria;p Proteobacteria | Xenobiotics Biodegradation and Metabolism   | 0.804660317  | 0.001597  |
| 43   | g unclassified;c Gammaproteobacteria;p Proteobacteria | Nucleotide Metabolism                       | 0.790501121  | 0.0022089 |
| 44   | g unclassified;c Gammaproteobacteria;p Proteobacteria | Cell Motility                               | 0.787707543  | 0.0023483 |
| 45   | g unclassified;c Gammaproteobacteria;p Proteobacteria | Transcription                               | 0.799993631  | 0.0017821 |
| 46   | g unclassified;c Gammaproteobacteria;p Proteobacteria | Metabolism of Terpenoids and Polyketides    | 0.779941016  | 0.0027111 |
| 47   | g unclassified;c Gammaproteobacteria;p Proteobacteria | Signal Transduction                         | 0.798056616  | 0.0018636 |
| 48   | g unclassified;c Gammaproteobacteria;p Proteobacteria | Glycan Biosynthesis and Metabolism          | 0.804412134  | 0.0016065 |
| 49   | g unclassified;c Gammaproteobacteria;p Proteobacteria | Enzyme Families                             | 0.790308153  | 0.0022183 |
| 50   | g unclassified;c Gammaproteobacteria;p Proteobacteria | Metabolism of Other Amino Acids             | 0.801338582  | 0.0017272 |
| 51   | g unclassified;c Gammaproteobacteria;p Proteobacteria | Biosynthesis of Other Secondary Metabolites | 0.806682974  | 0.0015216 |
| 52   | g unclassified;c Gammaproteobacteria;p Proteobacteria | Transport and Catabolism                    | 0.795081535  | 0.0019942 |
| 53   | g unclassified;c Gammaproteobacteria;p Proteobacteria | Signaling Molecules and Interaction         | 0.81852676   | 0.001133  |
| 54   | g unclassified;c Gammaproteobacteria;p Proteobacteria | Folding, Sorting and Degradation            | 0.77436386   | 0.0031088 |
| 55   | g unclassified;c Gammaproteobacteria;p Proteobacteria | Energy Metabolism                           | 0.764153295  | 0.0038072 |
| 56   | g unclassified;c Gammaproteobacteria;p Proteobacteria | Replication and Repair                      | 0.775090802  | 0.0030631 |
| 57   | g unclassified;c Gammaproteobacteria;p Proteobacteria | Translation                                 | 0.74467287   | 0.0054627 |
| 58   | g unclassified;c Gammaproteobacteria;p Proteobacteria | Cell Growth and Death                       | 0.738119702  | 0.0061261 |
| 59   | g Pseudomonas;p Proteobacteria                        | Signaling Molecules and Interaction         | 0.707461083  | 0.0100652 |
| 60   | g Pedobacter;p Bacteroidetes                          | Membrane Transport                          | 0.893348131  | 9.06E-05  |
| 61   | g Pedobacter;p Bacteroidetes                          | Amino Acid Metabolism                       | 0.880838021  | 0.0001544 |
| 62   | g Pedobacter;p Bacteroidetes                          | Carbohydrate Metabolism                     | 0.886101822  | 0.0001243 |
| 63   | g Pedobacter;p Bacteroidetes                          | Metabolism of Cofactors and Vitamins        | 0.866322712  | 0.0002674 |
| 64   | g Pedobacter;p Bacteroidetes                          | Lipid Metabolism                            | 0.868836174  | 0.0002443 |
| 65   | g Pedobacter;p Bacteroidetes                          | Xenobiotics Biodegradation and Metabolism   | 0.901155636  | 6.28E-05  |
| 66   | g Pedobacter;p Bacteroidetes                          | Nucleotide Metabolism                       | 0.853242227  | 0.0004168 |
| 67   | g Pedobacter;p Bacteroidetes                          | Cell Motility                               | 0.837653832  | 0.0006717 |
| 68   | g Pedobacter;p Bacteroidetes                          | Transcription                               | 0.895905863  | 8.06E-05  |
| 69   | g Pedobacter;p Bacteroidetes                          | Metabolism of Terpenoids and Polyketides    | 0.861753271  | 0.0003139 |
| 70   | g Pedobacter;p Bacteroidetes                          | Signal Transduction                         | 0.872031173  | 0.0002127 |
| 71   | g Pedobacter;p Bacteroidetes                          | Glycan Biosynthesis and Metabolism          | 0.875674106  | 0.0001892 |
| 72   | g Pedobacter;p Bacteroidetes                          | Enzyme Families                             | 0.876039584  | 0.0001865 |
| 73   | g Pedobacter;p Bacteroidetes                          | Metabolism of Other Amino Acids             | 0.893382833  | 9.05E-05  |
| 74   | g Pedobacter;p Bacteroidetes                          | Biosynthesis of Other Secondary Metabolites | 0.903859236  | 5.49E-05  |
| 75   | g Pedobacter;p Bacteroidetes                          | Transport and Catabolism                    | 0.866721648  | 0.0002637 |
| 76   | g Pedobacter;p Bacteroidetes                          | Signaling Molecules and Interaction         | 0.931328485  | 1.07E-05  |
| 77   | g Pedobacter;p Bacteroidetes                          | Folding, Sorting and Degradation            | 0.822879417  | 0.0010113 |
| 78   | g Pedobacter;p Bacteroidetes                          | Energy Metabolism                           | 0.82377778   | 0.0009875 |
| 79   | g Pedobacter;p Bacteroidetes                          | Replication and Repair                      | 0.813017182  | 0.0013028 |
| 80   | g Pedobacter;p Bacteroidetes                          | Translation                                 | 0.773057007  | 0.0031922 |
| 81   | g Pedobacter;p Bacteroidetes                          | Cell Growth and Death                       | 0.763963065  | 0.0038212 |
| 82   | g Pedobacter;p Bacteroidetes                          | Cell Communication                          | 0.880046352  | 0.0001594 |
| 83   | g unclassified;unknow                                 | Membrane Transport                          | 0.895693774  | 8.14E-05  |

|     |                                  |                                             |             |           |
|-----|----------------------------------|---------------------------------------------|-------------|-----------|
| 84  | g unclassified;unknow            | Amino Acid Metabolism                       | 0.883622125 | 0.0001379 |
| 85  | g unclassified;unknow            | Carbohydrate Metabolism                     | 0.88711917  | 0.0001191 |
| 86  | g unclassified;unknow            | Metabolism of Cofactors and Vitamins        | 0.870590753 | 0.0002291 |
| 87  | g unclassified;unknow            | Lipid Metabolism                            | 0.868443122 | 0.0002478 |
| 88  | g unclassified;unknow            | Xenobiotics Biodegradation and Metabolism   | 0.90206074  | 6.01E-05  |
| 89  | g unclassified;unknow            | Nucleotide Metabolism                       | 0.862656316 | 0.0003042 |
| 90  | g unclassified;unknow            | Cell Motility                               | 0.833240766 | 0.0007621 |
| 91  | g unclassified;unknow            | Transcription                               | 0.901831872 | 6.08E-05  |
| 92  | g unclassified;unknow            | Metabolism of Terpenoids and Polyketides    | 0.859202515 | 0.0003424 |
| 93  | g unclassified;unknow            | Signal Transduction                         | 0.871866784 | 0.0002185 |
| 94  | g unclassified;unknow            | Glycan Biosynthesis and Metabolism          | 0.876160937 | 0.0001857 |
| 95  | g unclassified;unknow            | Enzyme Families                             | 0.880589133 | 0.000156  |
| 96  | g unclassified;unknow            | Metabolism of Other Amino Acids             | 0.895995486 | 8.03E-05  |
| 97  | g unclassified;unknow            | Biosynthesis of Other Secondary Metabolites | 0.906367677 | 4.83E-05  |
| 98  | g unclassified;unknow            | Transport and Catabolism                    | 0.864494593 | 0.0002853 |
| 99  | g unclassified;unknow            | Signaling Molecules and Interaction         | 0.938474881 | 6.26E-06  |
| 100 | g unclassified;unknow            | Folding, Sorting and Degradation            | 0.832520823 | 0.0007777 |
| 101 | g unclassified;unknow            | Energy Metabolism                           | 0.828215027 | 0.0008762 |
| 102 | g unclassified;unknow            | Replication and Repair                      | 0.825407933 | 0.0009454 |
| 103 | g unclassified;unknow            | Translation                                 | 0.786608184 | 0.0024049 |
| 104 | g unclassified;unknow            | Cell Growth and Death                       | 0.780018633 | 0.0027666 |
| 105 | g unclassified;unknow            | Cell Communication                          | 0.834813484 | 0.0007289 |
| 106 | g unclassified;p Chloroflexi     | Membrane Transport                          | 0.860545874 | 0.0003271 |
| 107 | g unclassified;p Chloroflexi     | Amino Acid Metabolism                       | 0.852106078 | 0.0004324 |
| 108 | g unclassified;p Chloroflexi     | Carbohydrate Metabolism                     | 0.853867236 | 0.0004085 |
| 109 | g unclassified;p Chloroflexi     | Metabolism of Cofactors and Vitamins        | 0.836395725 | 0.0006966 |
| 110 | g unclassified;p Chloroflexi     | Lipid Metabolism                            | 0.835638806 | 0.0007119 |
| 111 | g unclassified;p Chloroflexi     | Xenobiotics Biodegradation and Metabolism   | 0.877830007 | 0.000174  |
| 112 | g unclassified;p Chloroflexi     | Nucleotide Metabolism                       | 0.826009543 | 0.0009303 |
| 113 | g unclassified;p Chloroflexi     | Cell Motility                               | 0.81374528  | 0.0012793 |
| 114 | g unclassified;p Chloroflexi     | Transcription                               | 0.867890853 | 0.0002528 |
| 115 | g unclassified;p Chloroflexi     | Metabolism of Terpenoids and Polyketides    | 0.826549342 | 0.0009168 |
| 116 | g unclassified;p Chloroflexi     | Signal Transduction                         | 0.845451488 | 0.0005325 |
| 117 | g unclassified;p Chloroflexi     | Glycan Biosynthesis and Metabolism          | 0.848477776 | 0.0004849 |
| 118 | g unclassified;p Chloroflexi     | Enzyme Families                             | 0.845740178 | 0.0005278 |
| 119 | g unclassified;p Chloroflexi     | Metabolism of Other Amino Acids             | 0.86761426  | 0.0002554 |
| 120 | g unclassified;p Chloroflexi     | Biosynthesis of Other Secondary Metabolites | 0.879516943 | 0.0001628 |
| 121 | g unclassified;p Chloroflexi     | Transport and Catabolism                    | 0.836544987 | 0.0006936 |
| 122 | g unclassified;p Chloroflexi     | Signaling Molecules and Interaction         | 0.92208105  | 1.98E-05  |
| 123 | g unclassified;p Chloroflexi     | Folding, Sorting and Degradation            | 0.790689677 | 0.0021997 |
| 124 | g unclassified;p Chloroflexi     | Energy Metabolism                           | 0.786232915 | 0.0024245 |
| 125 | g unclassified;p Chloroflexi     | Replication and Repair                      | 0.784112066 | 0.0025374 |
| 126 | g unclassified;p Chloroflexi     | Translation                                 | 0.736412193 | 0.0063085 |
| 127 | g unclassified;p Chloroflexi     | Cell Growth and Death                       | 0.729780406 | 0.0070558 |
| 128 | g Rhodococcus;p Actinobacteria   | Membrane Transport                          | 0.71316346  | 0.0092195 |
| 129 | g Rhodococcus;p Actinobacteria   | Amino Acid Metabolism                       | 0.707710647 | 0.010027  |
| 130 | g Rhodococcus;p Actinobacteria   | Carbohydrate Metabolism                     | 0.707453792 | 0.0100663 |
| 131 | g Rhodococcus;p Actinobacteria   | Xenobiotics Biodegradation and Metabolism   | 0.736446305 | 0.0063048 |
| 132 | g Rhodococcus;p Actinobacteria   | Transcription                               | 0.72232478  | 0.0079732 |
| 133 | g Rhodococcus;p Actinobacteria   | Metabolism of Other Amino Acids             | 0.723833387 | 0.0077808 |
| 134 | g Rhodococcus;p Actinobacteria   | Biosynthesis of Other Secondary Metabolites | 0.735653475 | 0.0063908 |
| 135 | g Rhodococcus;p Actinobacteria   | Signaling Molecules and Interaction         | 0.78383533  | 0.0025524 |
| 136 | g Enterobacter;p Proteobacteria  | Membrane Transport                          | 0.829034168 | 0.0008568 |
| 137 | g Enterobacter;p Proteobacteria  | Amino Acid Metabolism                       | 0.80995309  | 0.0014054 |
| 138 | g Enterobacter;p Proteobacteria  | Carbohydrate Metabolism                     | 0.817734828 | 0.0011563 |
| 139 | g Enterobacter;p Proteobacteria  | Metabolism of Cofactors and Vitamins        | 0.794931937 | 0.0020001 |
| 140 | g Enterobacter;p Proteobacteria  | Lipid Metabolism                            | 0.7943284   | 0.0020284 |
| 141 | g Enterobacter;p Proteobacteria  | Xenobiotics Biodegradation and Metabolism   | 0.82997256  | 0.0008349 |
| 142 | g Enterobacter;p Proteobacteria  | Nucleotide Metabolism                       | 0.783857905 | 0.0025512 |
| 143 | g Enterobacter;p Proteobacteria  | Cell Motility                               | 0.74549347  | 0.0053836 |
| 144 | g Enterobacter;p Proteobacteria  | Transcription                               | 0.833941645 | 0.0007472 |
| 145 | g Enterobacter;p Proteobacteria  | Metabolism of Terpenoids and Polyketides    | 0.784595949 | 0.0025113 |
| 146 | g Enterobacter;p Proteobacteria  | Signal Transduction                         | 0.795231734 | 0.0019874 |
| 147 | g Enterobacter;p Proteobacteria  | Glycan Biosynthesis and Metabolism          | 0.799827661 | 0.001789  |
| 148 | g Enterobacter;p Proteobacteria  | Enzyme Families                             | 0.808922811 | 0.0014412 |
| 149 | g Enterobacter;p Proteobacteria  | Metabolism of Other Amino Acids             | 0.823711873 | 0.0009893 |
| 150 | g Enterobacter;p Proteobacteria  | Biosynthesis of Other Secondary Metabolites | 0.836220506 | 0.0007001 |
| 151 | g Enterobacter;p Proteobacteria  | Transport and Catabolism                    | 0.786511876 | 0.0024099 |
| 152 | g Enterobacter;p Proteobacteria  | Signaling Molecules and Interaction         | 0.873115333 | 0.0002085 |
| 153 | g Enterobacter;p Proteobacteria  | Folding, Sorting and Degradation            | 0.75072643  | 0.0048994 |
| 154 | g Enterobacter;p Proteobacteria  | Energy Metabolism                           | 0.749394433 | 0.0050194 |
| 155 | g Enterobacter;p Proteobacteria  | Replication and Repair                      | 0.740766245 | 0.0058512 |
| 156 | g Enterobacter;p Proteobacteria  | Translation                                 | 0.701222663 | 0.0110551 |
| 157 | g Enterobacter;p Proteobacteria  | Cell Communication                          | 0.921755376 | 2.02E-05  |
| 158 | g Achromobacter;p Proteobacteria | Membrane Transport                          | 0.818798002 | 0.0011251 |
| 159 | g Achromobacter;p Proteobacteria | Amino Acid Metabolism                       | 0.807248366 | 0.001501  |
| 160 | g Achromobacter;p Proteobacteria | Carbohydrate Metabolism                     | 0.811795362 | 0.001343  |
| 161 | g Achromobacter;p Proteobacteria | Metabolism of Cofactors and Vitamins        | 0.789228877 | 0.0022716 |
| 162 | g Achromobacter;p Proteobacteria | Lipid Metabolism                            | 0.792322364 | 0.0021215 |
| 163 | g Achromobacter;p Proteobacteria | Xenobiotics Biodegradation and Metabolism   | 0.834600699 | 0.0007333 |
| 164 | g Achromobacter;p Proteobacteria | Nucleotide Metabolism                       | 0.773934264 | 0.003136  |
| 165 | g Achromobacter;p Proteobacteria | Cell Motility                               | 0.7599827   | 0.0041243 |
| 166 | g Achromobacter;p Proteobacteria | Transcription                               | 0.823409812 | 0.0009972 |
| 167 | g Achromobacter;p Proteobacteria | Metabolism of Terpenoids and Polyketides    | 0.785083583 | 0.0024852 |
| 168 | g Achromobacter;p Proteobacteria | Signal Transduction                         | 0.796259989 | 0.0019416 |
| 169 | g Achromobacter;p Proteobacteria | Glycan Biosynthesis and Metabolism          | 0.797253479 | 0.0018982 |
| 170 | g Achromobacter;p Proteobacteria | Enzyme Families                             | 0.800803736 | 0.0017489 |
| 171 | g Achromobacter;p Proteobacteria | Metabolism of Other Amino Acids             | 0.823040967 | 0.001007  |

|     |                                    |                                             |             |           |
|-----|------------------------------------|---------------------------------------------|-------------|-----------|
| 172 | g Achromobacter;p Proteobacteria   | Biosynthesis of Other Secondary Metabolites | 0.835162831 | 0.0007217 |
| 173 | g Achromobacter;p Proteobacteria   | Transport and Catabolism                    | 0.788435268 | 0.0023113 |
| 174 | g Achromobacter;p Proteobacteria   | Signaling Molecules and Interaction         | 0.876091511 | 0.0001862 |
| 175 | g Achromobacter;p Proteobacteria   | Folding, Sorting and Degradation            | 0.737533265 | 0.0061883 |
| 176 | g Achromobacter;p Proteobacteria   | Energy Metabolism                           | 0.739285004 | 0.0060039 |
| 177 | g Achromobacter;p Proteobacteria   | Replication and Repair                      | 0.727032369 | 0.0073842 |
| 178 | g Achromobacter;p Proteobacteria   | Cell Communication                          | 0.77771922  | 0.0029021 |
| 179 | g Devosia;p Proteobacteria         | Membrane Transport                          | 0.703494142 | 0.0106867 |
| 180 | g Devosia;p Proteobacteria         | Carbohydrate Metabolism                     | 0.70257895  | 0.010834  |
| 181 | g Devosia;p Proteobacteria         | Xenobiotics Biodegradation and Metabolism   | 0.72894399  | 0.0071546 |
| 182 | g Devosia;p Proteobacteria         | Transcription                               | 0.703147688 | 0.0107423 |
| 183 | g Devosia;p Proteobacteria         | Metabolism of Other Amino Acids             | 0.714155448 | 0.0090779 |
| 184 | g Devosia;p Proteobacteria         | Biosynthesis of Other Secondary Metabolites | 0.722274199 | 0.0079797 |
| 185 | g Devosia;p Proteobacteria         | Signaling Molecules and Interaction         | 0.752424701 | 0.0047496 |
| 186 | g Sphingobacterium;p Bacteroidetes | Signaling Molecules and Interaction         | 0.73277786  | 0.0067102 |
| 187 | g Delftia;p Proteobacteria         | Membrane Transport                          | 0.71543512  | 0.0088978 |
| 188 | g Delftia;p Proteobacteria         | Carbohydrate Metabolism                     | 0.70286061  | 0.0107885 |
| 189 | g Delftia;p Proteobacteria         | Xenobiotics Biodegradation and Metabolism   | 0.716729414 | 0.0087183 |
| 190 | g Delftia;p Proteobacteria         | Transcription                               | 0.722306349 | 0.0079756 |
| 191 | g Delftia;p Proteobacteria         | Metabolism of Other Amino Acids             | 0.709336095 | 0.009781  |
| 192 | g Delftia;p Proteobacteria         | Biosynthesis of Other Secondary Metabolites | 0.723835317 | 0.0077805 |
| 193 | g Delftia;p Proteobacteria         | Signaling Molecules and Interaction         | 0.769029503 | 0.0034602 |
| 194 | g Delftia;p Proteobacteria         | Cell Communication                          | 0.862513936 | 0.0003057 |
